# Supplementary material for: Glucocorticoid receptor regulates PD-L1 and MHC-I in pancreatic cancer cells to promote immune evasion and immunotherapy resistance
Source: PubMed Central journal article supplement (PMC8649069; doi:10.1038/s41467-021-27349-7), 2021-12-06
Supplement: 41467_2021_27349_MOESM1_ESM.pdf [file 41467_2021_27349_MOESM1_ESM.pdf]

## **Supplementary Information**

**Glucocorticoid receptor regulates PD-L1 and MHC-I in pancreatic cancer cells to promote immune evasion and immunotherapy resistance**

**Yalan Deng, Xianghou Xia, Yang Zhao, Zilong Zhao, Consuelo Martinez, Wenjuan Yin, Jun Yao, Qinglei Hang, Weiche Wu, Jie Zhang, Yang Yu, Weiya Xia, Fan Yao, Di Zhao, Yutong Sun, Haoqiang Ying, Mien-Chie Hung, Li Ma**

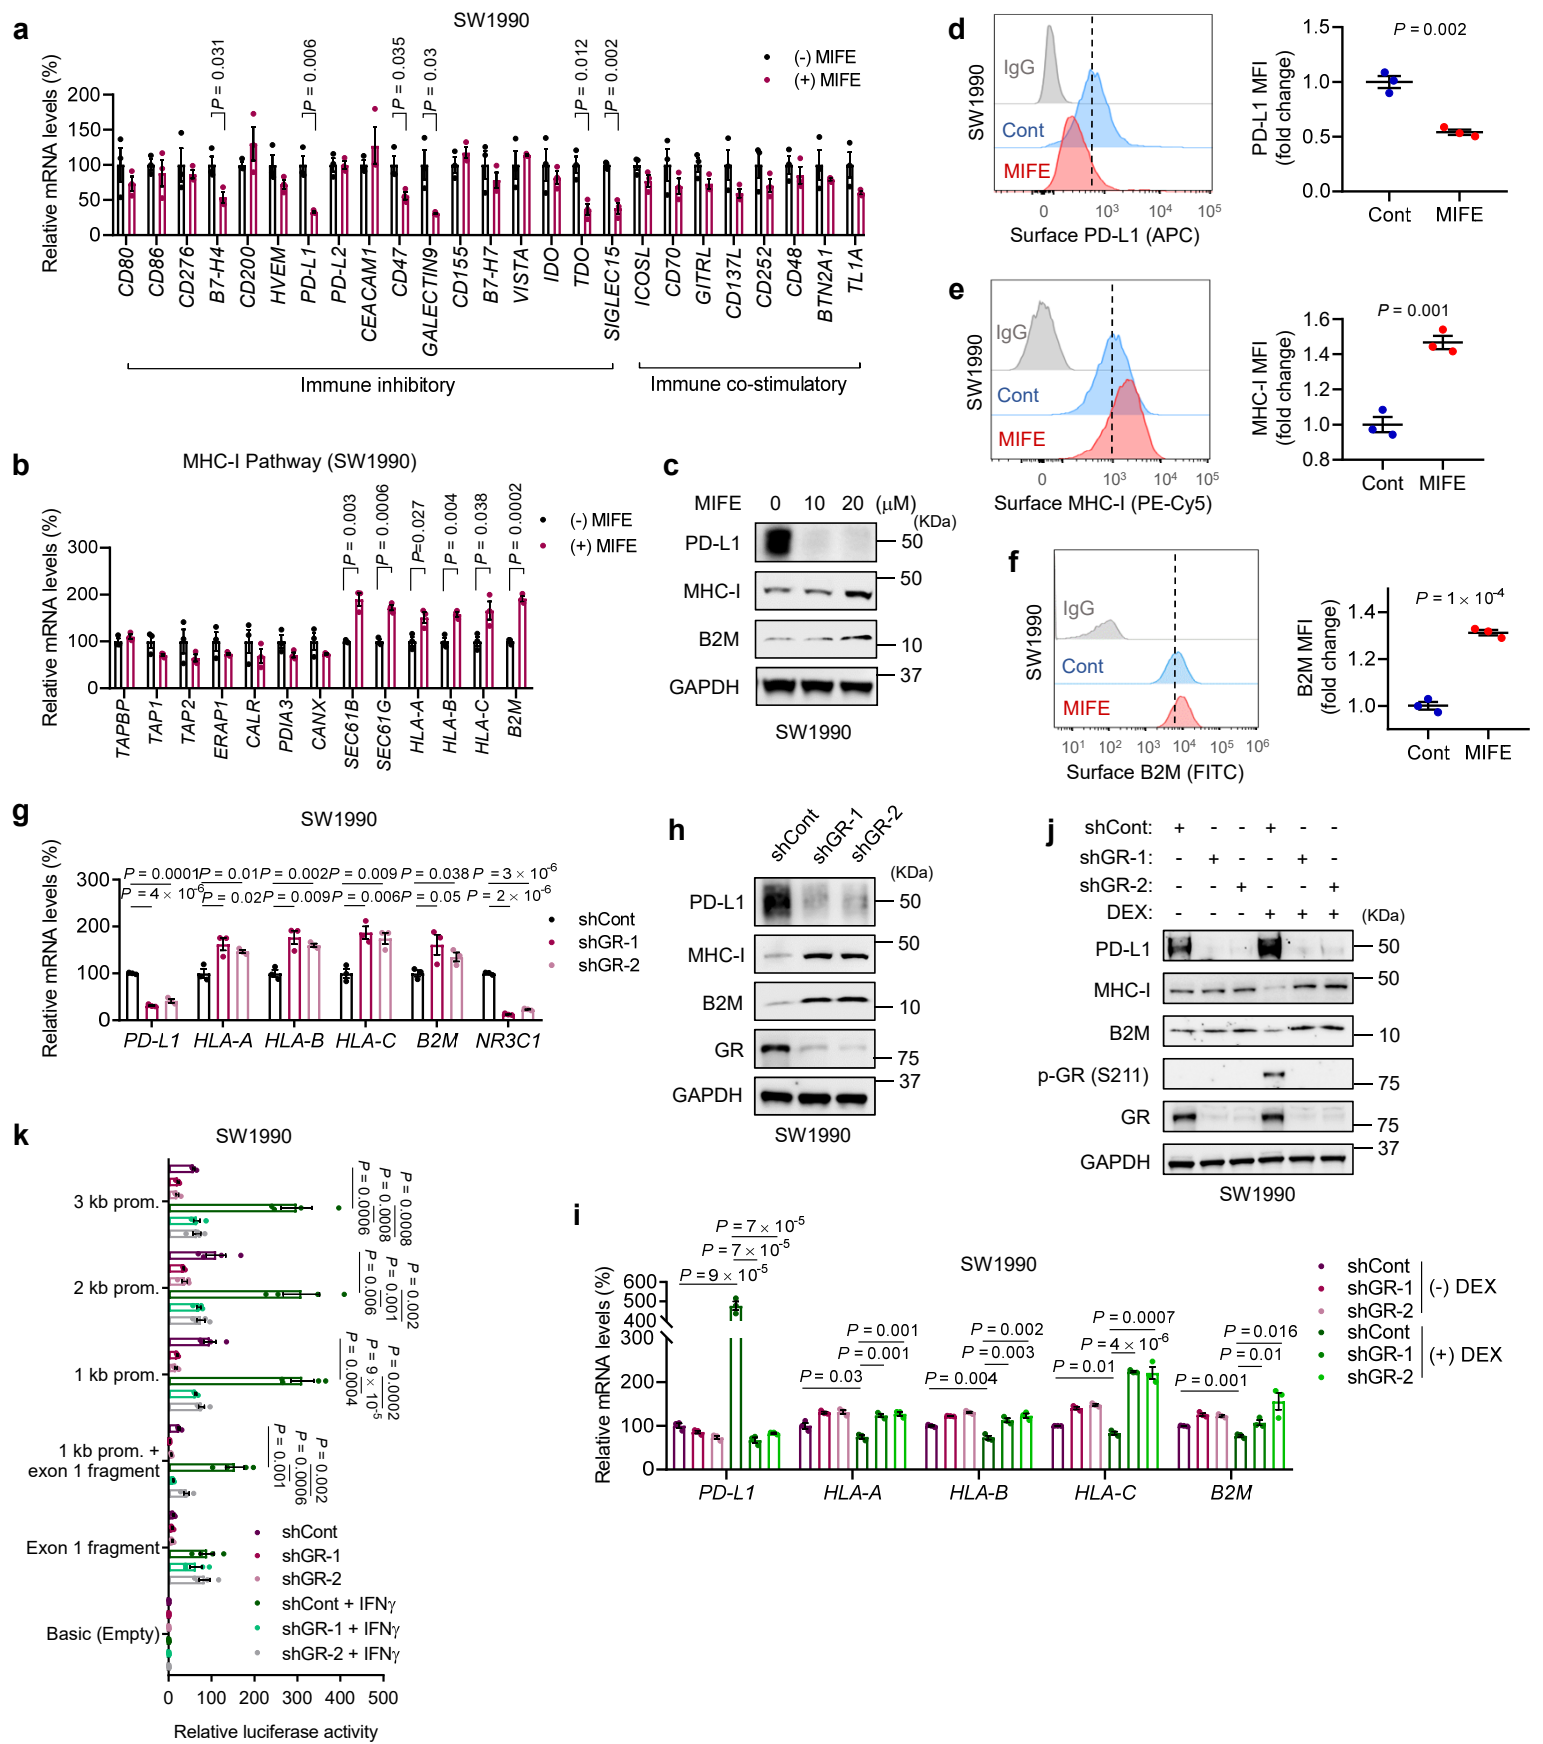

**Supplementary Fig. 1. GR activates PD-L1 expression and represses MHC-I expression in the human PDAC cell line SW1990.**

**a and b**, qPCR analysis of immune inhibitory and immune co-stimulatory genes (**a**) and genes involved in the MHC-I antigen presentation pathway (**b**) in SW1990 cells with or without mifepristone (MIFE, 20  $\mu$ M, 72 h) treatment.  $n = 3$  technical replicates per group.

**c**, Immunoblotting of PD-L1, MHC-I, and B2M in SW1990 cells with or without MIFE treatment with the indicated doses for 72 h.

**d-f**, Representative flow cytometry plots and quantification (by MFI: mean fluorescence intensity) of cell-surface PD-L1 (**d**), MHC-I (**e**), and B2M (**f**) in SW1990 cells with or without MIFE (20  $\mu$ M, 72 h) treatment.  $n = 3$  biological replicates per group.

**g**, qPCR analysis of *PD-L1*, *HLA-A*, *HLA-B*, *HLA-C*, *B2M*, and *NR3C1* in GR-knockdown SW1990 cells.  $n = 3$  technical replicates per group.

**h**, Immunoblotting of PD-L1, MHC-I, B2M, and GR in GR-knockdown SW1990 cells.

**i**, qPCR analysis of *PD-L1*, *HLA-A*, *HLA-B*, *HLA-C*, and *B2M* in GR-knockdown SW1990 cells, with or without dexamethasone (DEX, 100 nM, 3 h) treatment.  $n = 3$  technical replicates per group.

**j**, Immunoblotting of PD-L1, MHC-I, B2M, p-GR (Ser211), and GR in GR-knockdown SW1990 cells, with or without dexamethasone (DEX, 100 nM, 3 h) treatment.

**k**, Normalized luciferase activity of the reporters containing the indicated human *PD-L1* gene promoter regions in GR-knockdown SW1990 cells, with or without IFN $\gamma$  (10 ng ml $^{-1}$ , 8 h) treatment.  $n = 4$  wells per group.

Statistical significance in **a**, **b**, **d-g**, **i**, and **k** was determined by a two-tailed unpaired *t*-test. Error bars are s.e.m. Source data are provided as a Source Data file.

○ (-) DEX (-) MIFE   ● (+) DEX (-) MIFE   ● (+) DEX (+) MIFE

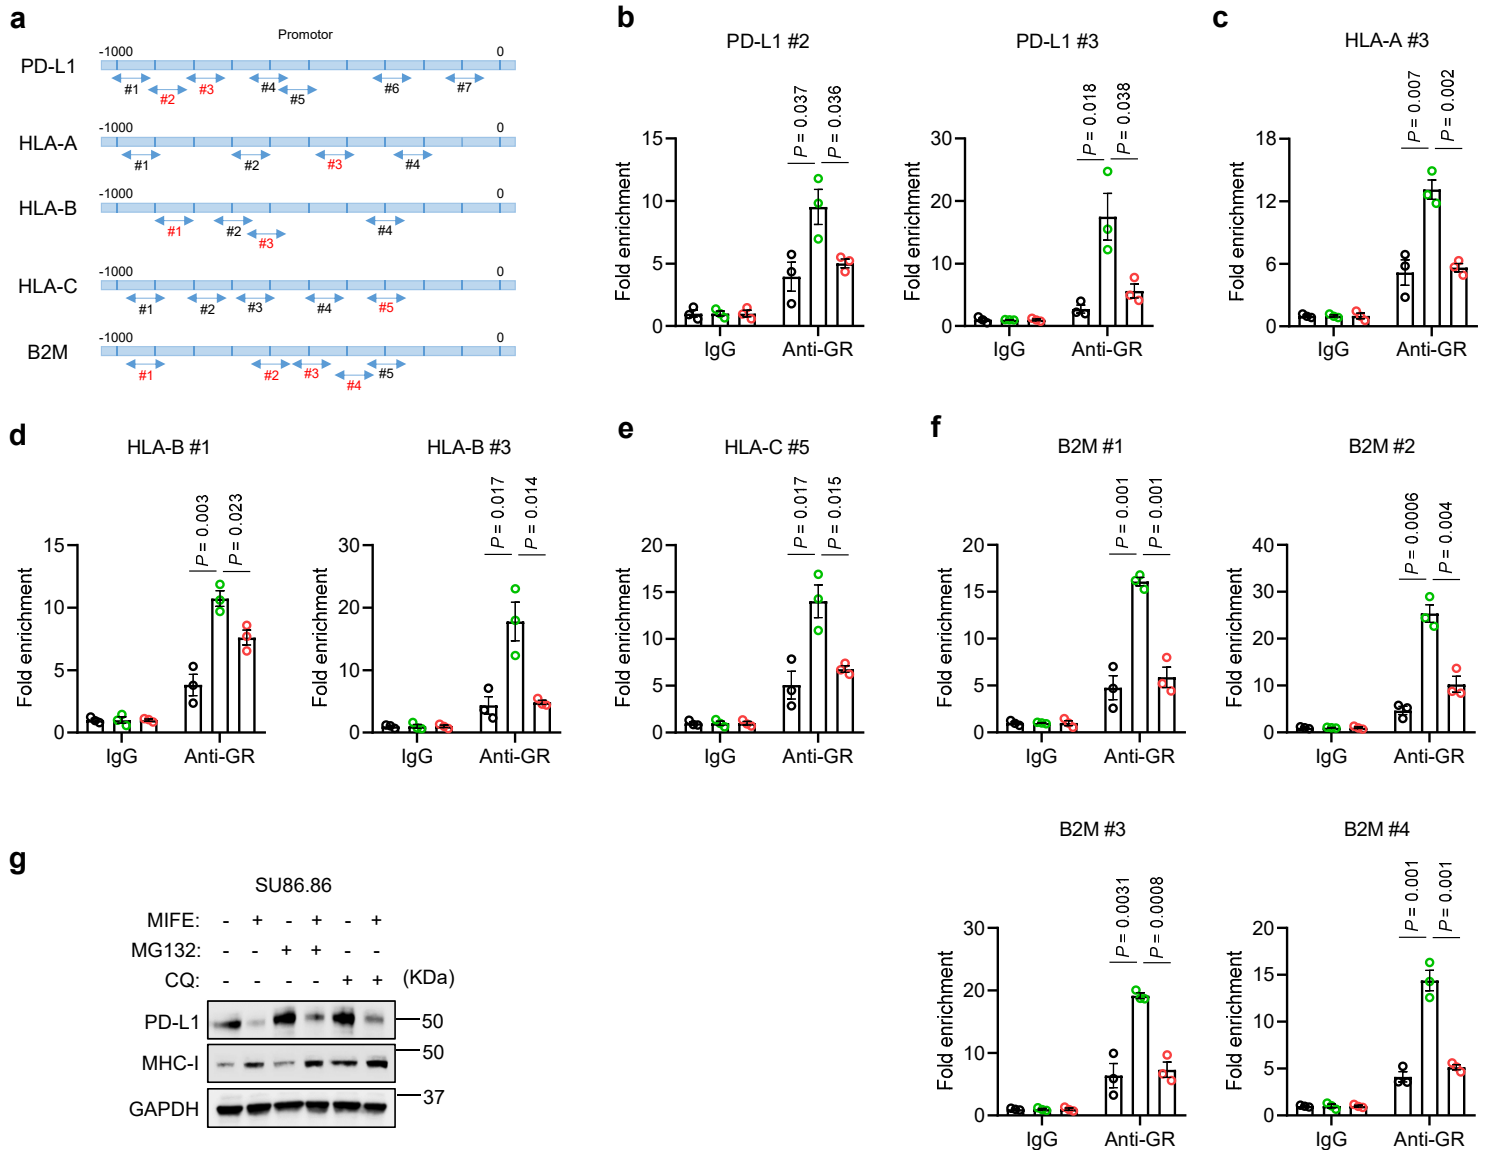

### Supplementary Fig. 2. GR is a direct regulator of PD-L1 and MHC-I genes.

**a**, Schematic representation of human *PD-L1*, *HLA-A*, *HLA-B*, *HLA-C*, and *B2M* gene promoter regions and ChIP-qPCR amplicons. The red color indicates that the binding to GR was significantly induced by dexamethasone treatment, which was reversed by co-treatment with mifepristone.

**b-f**, ChIP-qPCR analysis showing the occupancy of *PD-L1* (**b**), *HLA-A* (**c**), *HLA-B* (**d**), *HLA-C* (**e**), and *B2M* (**f**) promoters by GR. Endogenous GR was immunoprecipitated from SU86.86 cells treated with vehicle or dexamethasone (100 nM) with or without mifepristone (100 nM) for 30 min. Statistical significance was determined by a two-tailed unpaired *t*-test. Error bars are s.e.m. *n* = 3 biological replicates per group.

**g**, Immunoblotting of PD-L1, MHC-I, and GAPDH in SU86.86 cells with or without the treatment of mifepristone (20  $\mu$ M, 48 h), MG132 (10  $\mu$ M, 6 h), and chloroquine (CQ, 20  $\mu$ M, 4 h).

Source data are provided as a Source Data file.

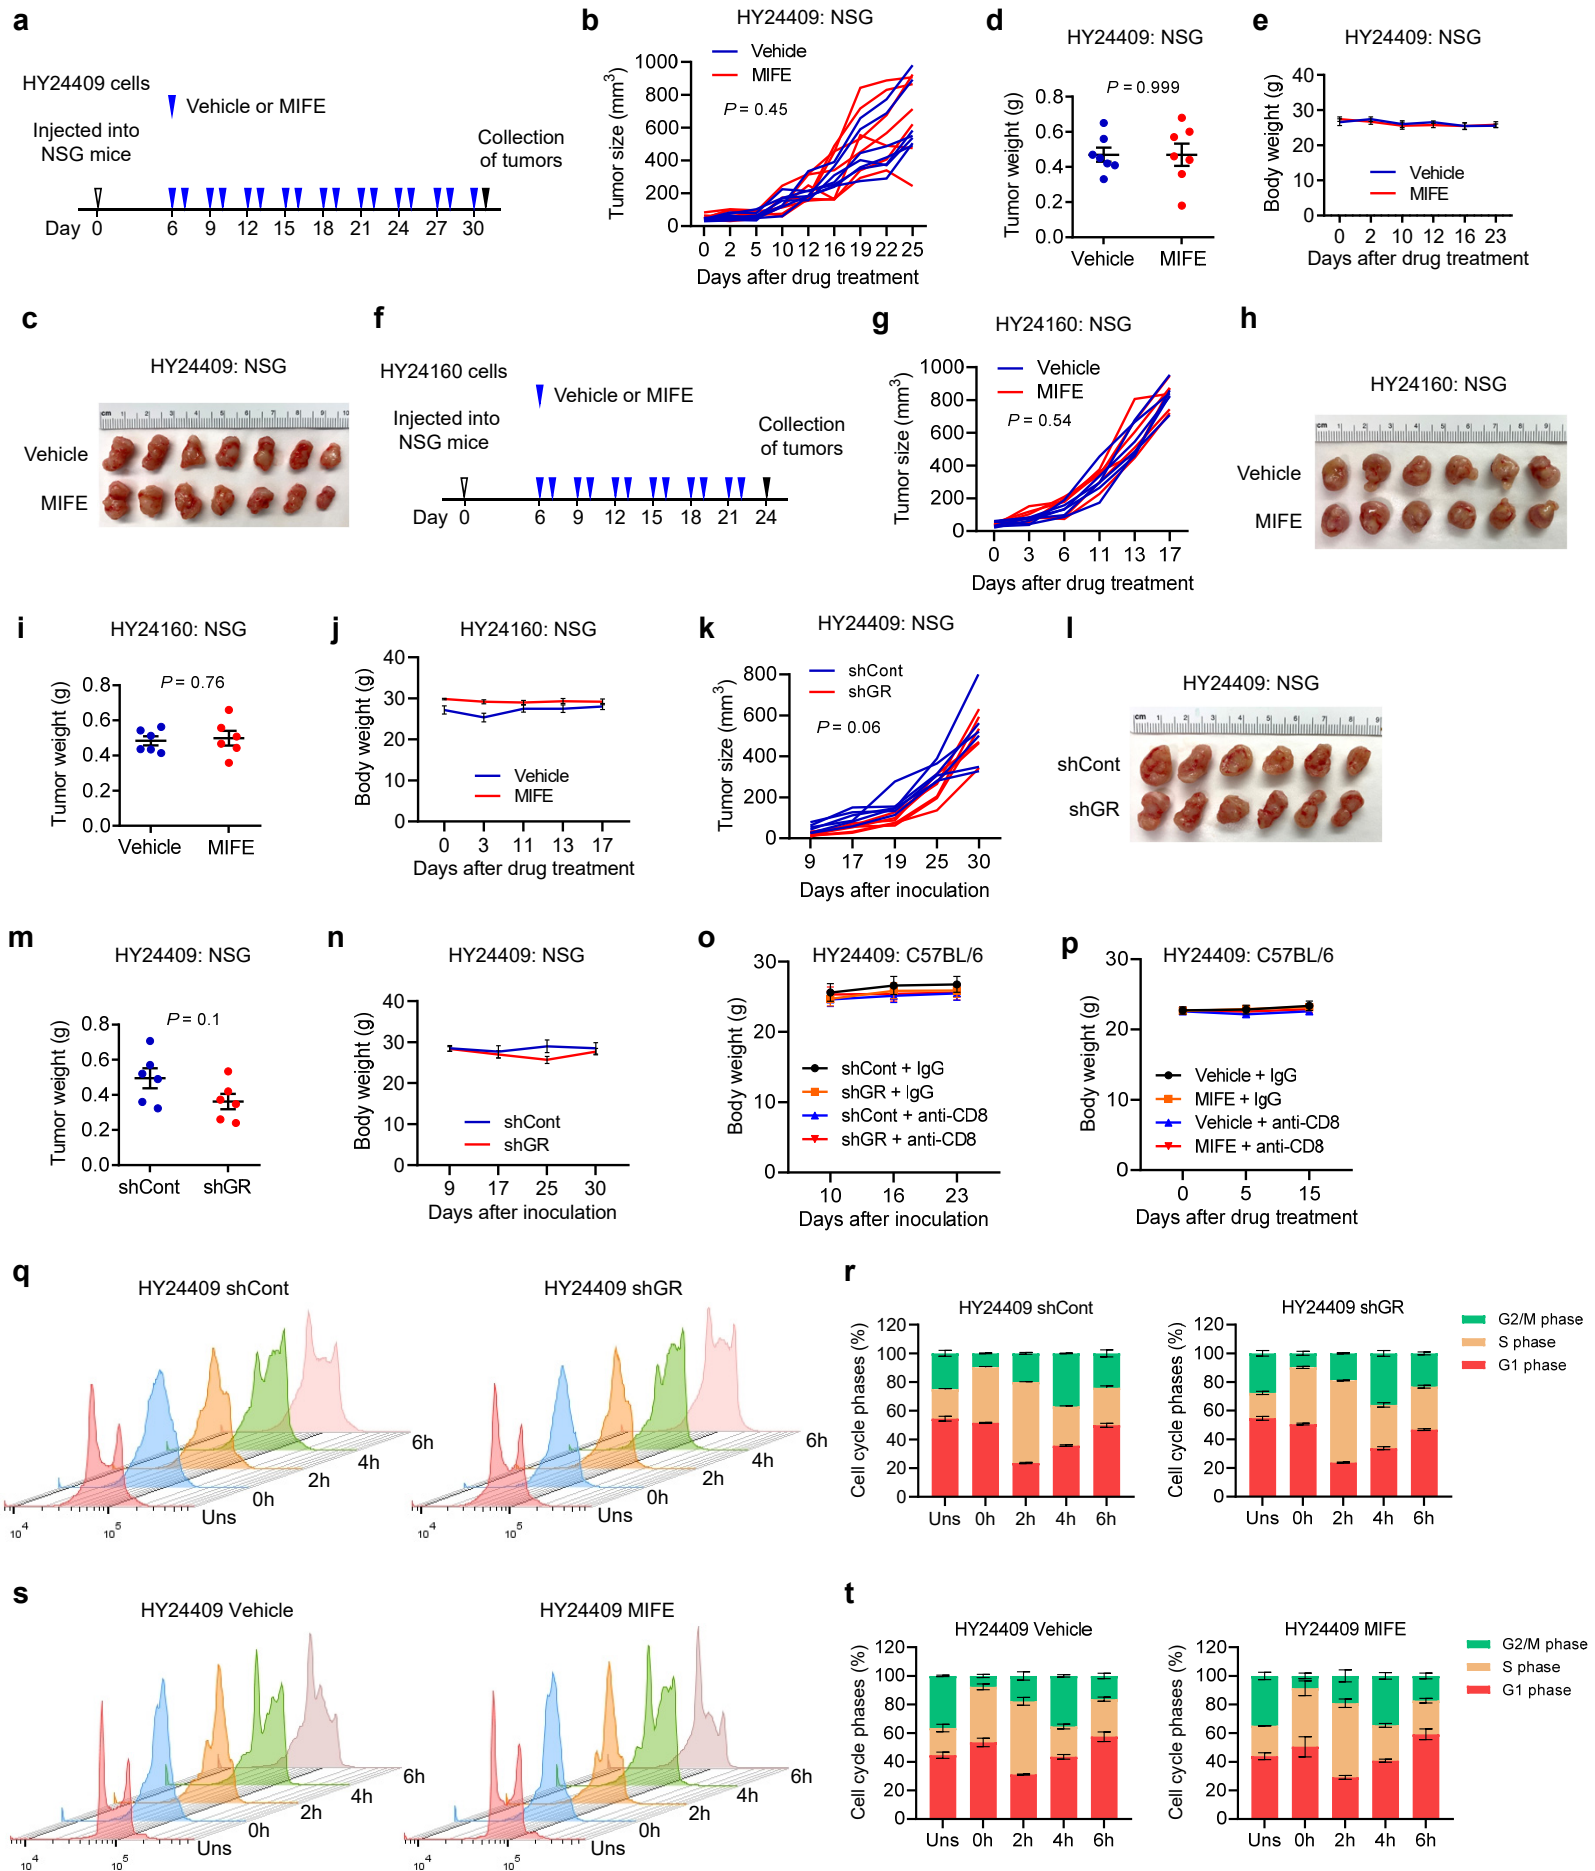

**Supplementary Fig. 3. GR inhibition or depletion does not affect cell cycle progression or tumor growth in immunodeficient mice.**

**a-e**, Tumor-bearing NSG mice (implanted with  $4 \times 10^4$  HY24409 cells) received vehicle or mifepristone (MIFE) treatment.  $n = 7$  mice per group.

**a**, Study design.

**b**, Tumor growth curves.

**c**, Endpoint tumor images.

**d**, Endpoint tumor weight.

**e**, Body weight.

**f-j**, Tumor-bearing NSG mice (implanted with  $8 \times 10^4$  HY24160 cells) received vehicle or mifepristone (MIFE) treatment.  $n = 6$  mice per group.

**f**, Study design.

**g**, Tumor growth curves.

**h**, Endpoint tumor images.

**i**, Endpoint tumor weight.

**j**, Body weight.

**k-n**, NSG mice were implanted with  $1 \times 10^5$  HY24409 cells transduced with control shRNA or GR shRNA.  $n = 6$  mice per group.

**k**, Tumor growth curves.

**l**, Endpoint tumor images.

**m**, Endpoint tumor weight.

**n**, Body weight.

**o** and **p**, Body weight of C57BL/6 mice bearing orthotopic HY24409 tumors expressing either control shRNA or GR shRNA (**o**), and C57BL/6 mice bearing vehicle- and MIFE-treated orthotopic HY24409 tumors (**p**), with or without CD8<sup>+</sup> T cell depletion.  $n = 5$  mice per group.

**q** and **r**, Cell-cycle profile histograms (**q**) and quantitative analysis of the cell-cycle distribution (**r**) in HY24409 cells transduced with control shRNA or GR shRNA. Cells were collected from unsynchronized (Uns) conditions and at different time points after release from double thymidine block.  $n = 3$  biological replicates per group.

**s** and **t**, Cell-cycle profile histograms (**s**) and quantitative analysis of the cell-cycle distribution (**t**) in HY24409 cells pretreated with vehicle or mifepristone (20  $\mu$ M, 48 h), followed by double-thymidine block and release.  $n = 3$  biological replicates per group.

Statistical significance was determined by two-way analysis of variance in **b**, **g**, and **k**, and was determined by a two-tailed unpaired *t*-test in **d**, **i**, and **m**. Error bars are s.e.m. Source data are provided as a Source Data file.

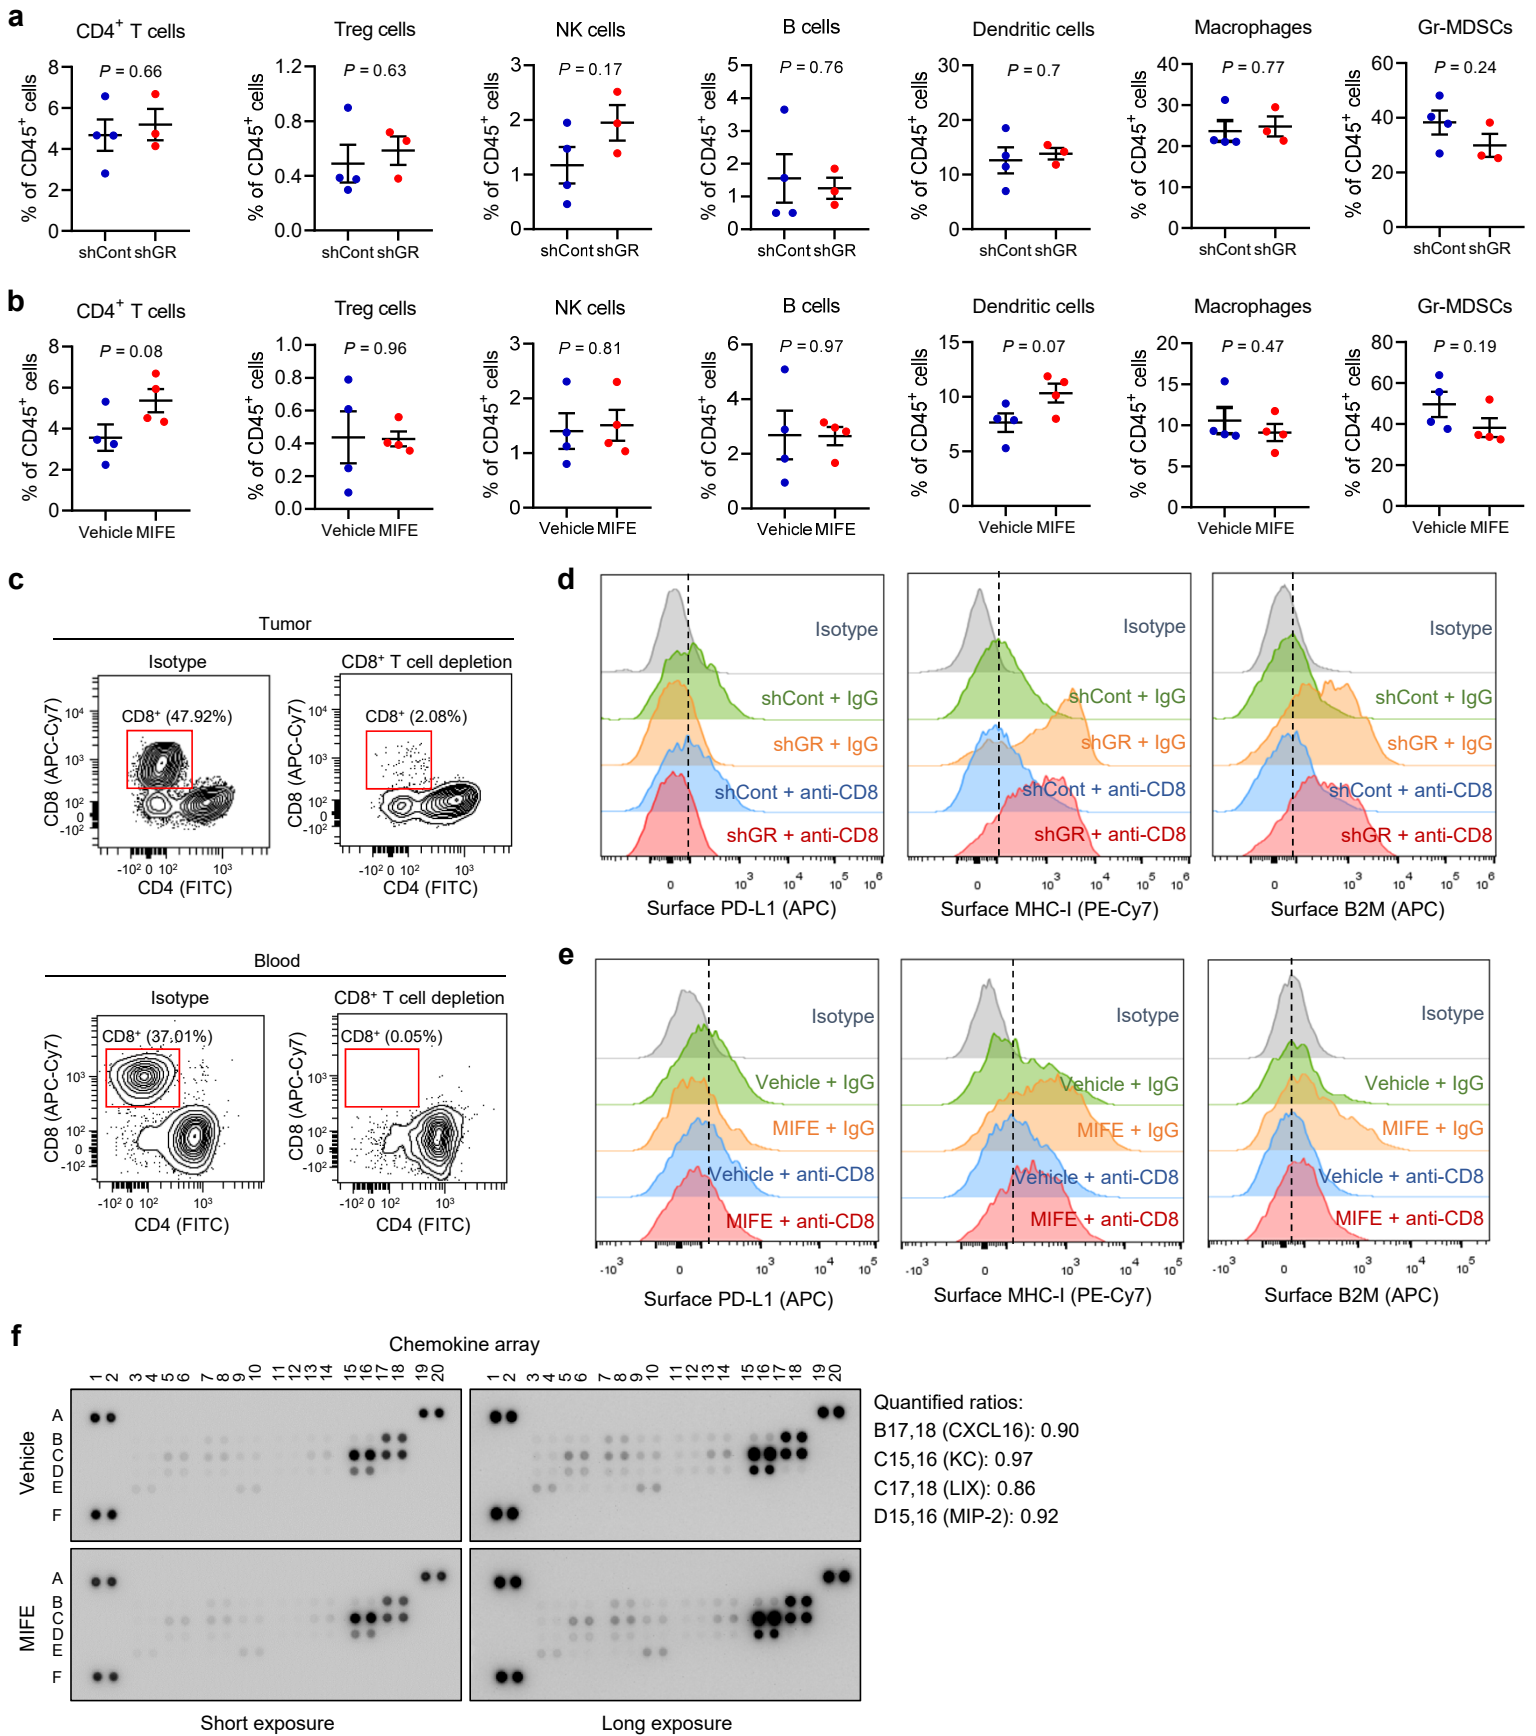

**Supplementary Fig. 4. Effects of GR depletion or inhibition on mice bearing the KPC line HY24409.**

**a**, Quantification of tumor-infiltrating immune cell populations in orthotopic HY24409 tumors expressing either control shRNA or GR shRNA. Gr-MDSCs: granulocytic myeloid-derived suppressor cells.  $n = 3-4$  mice per group.

**b**, Quantification of tumor-infiltrating immune cell populations in vehicle- and mifepristone (MIFE)-treated orthotopic HY24409 tumors.  $n = 4$  mice per group. Statistical significance in **a** and **b** was determined by a two-tailed unpaired *t*-test. Error bars are s.e.m.

**c**, Representative flow cytometry plots (pre-gated on T cells by CD45<sup>+</sup>CD3<sup>+</sup>) showing the relative abundance of CD8<sup>+</sup> T cells in HY24409 tumor-bearing mice that received isotype control (IgG) or anti-CD8 antibody treatment. Flow cytometry was performed on tumor samples (upper panel) and blood samples (lower panel).

**d**, Representative flow cytometry plots of cell-surface PD-L1 (left), MHC-I (H-2K<sup>b</sup>) (middle), and B2M (right) levels in cancer cells (gated by ZombieDye<sup>-</sup>CD45<sup>-</sup>luciferase<sup>+</sup>) from orthotopic HY24409 tumors expressing either control shRNA or GR shRNA, with or without CD8<sup>+</sup> T cell depletion. Related to **Fig. 4j**.

**e**, Representative flow cytometry plots of cell-surface PD-L1 (left), MHC-I (H-2K<sup>b</sup>) (middle), and B2M (right) levels in cancer cells (gated by ZombieDye<sup>-</sup>CD45<sup>-</sup>luciferase<sup>+</sup>) from vehicle- and MIFE-treated orthotopic HY24409 tumors, with or without CD8<sup>+</sup> T cell depletion. Related to **Fig. 4k**.

**f**, Chemokine arrays of the conditioned medium of HY24409 cells with or without MIFE (20  $\mu$ M, 48 h) treatment. See also **Supplementary Table 7**.

Source data are provided as a Source Data file.



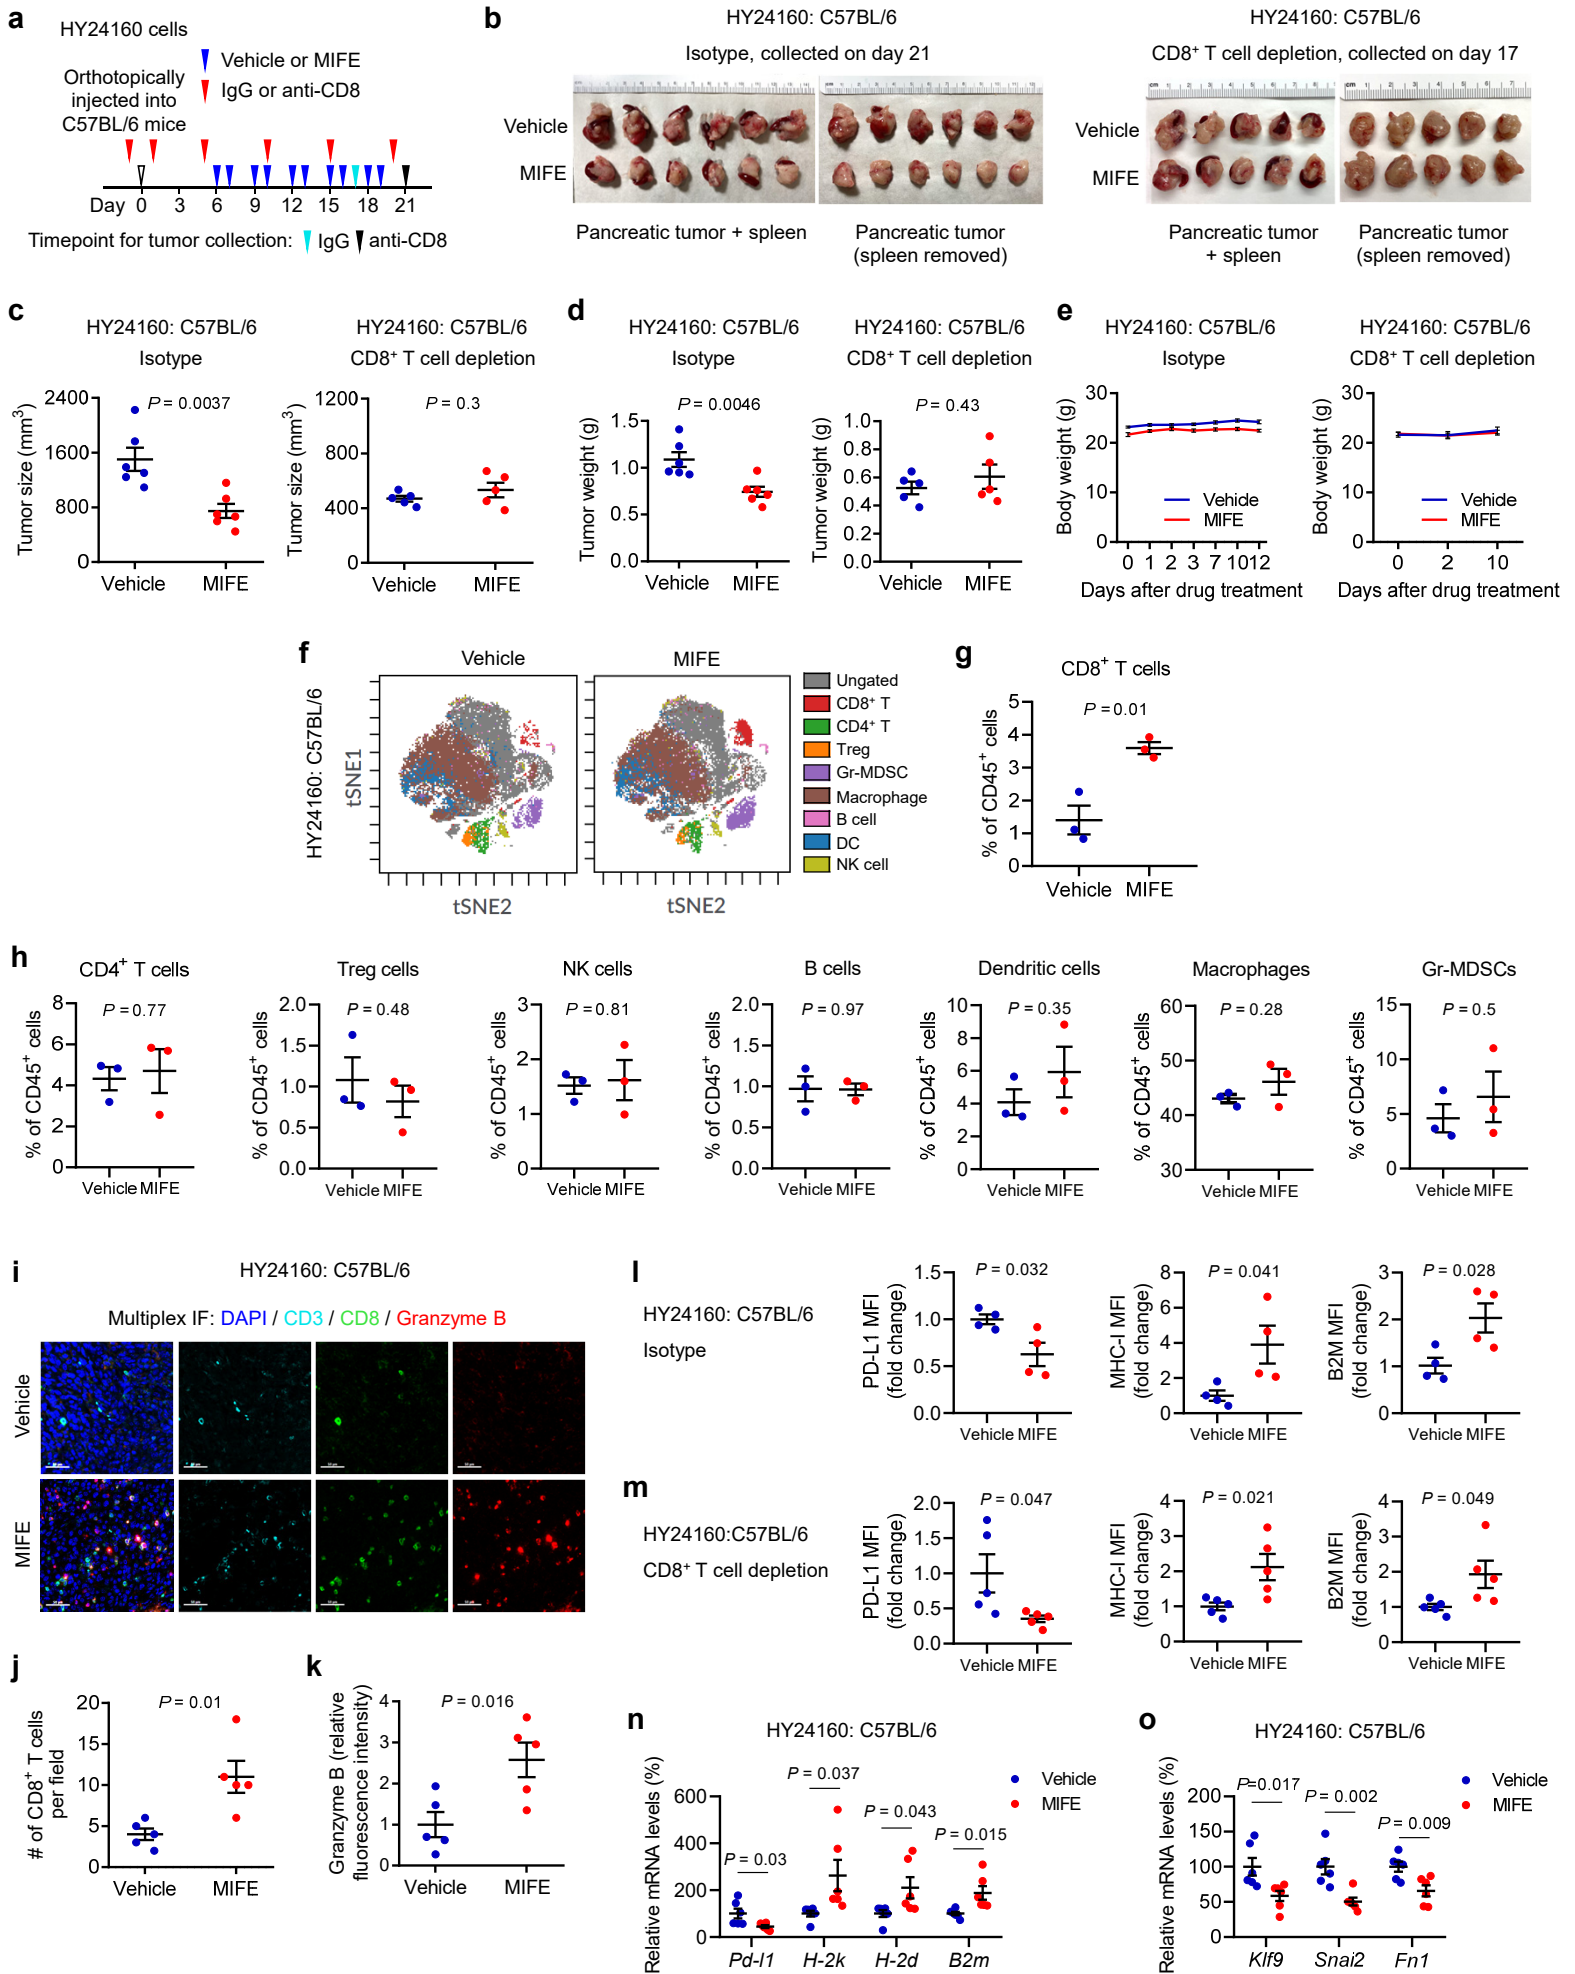

**Supplementary Fig. 5. Effects of GR inhibition on anti-tumor immunity in the KPC line HY24160.**

**a-o**, C57BL/6 mice bearing orthotopic pancreatic tumors (implanted with  $4 \times 10^4$  HY24160 cells) received vehicle or mifepristone (MIFE) and isotype control (IgG) or anti-CD8 antibody treatment.  $n = 5-6$  mice per group.

**a**, Study design.

**b**, Endpoint tumor images.

**c**, Endpoint tumor size.

**d**, Endpoint tumor weight.

**e**, Body weight.

**f**, Immune profiling of vehicle- and MIFE-treated orthotopic HY24160 tumors by CyTOF. Representative viSNE plots were colored by immune cell populations.

**g**, CD8<sup>+</sup> T cell quantification.

**h**, Quantification of tumor-infiltrating immune cell populations in vehicle- and MIFE-treated orthotopic HY24160 tumors. Gr-MDSCs: granulocytic myeloid-derived suppressor cells.

**i-k**, Multiplex immunofluorescent staining of CD3, CD8, and granzyme B in vehicle- and MIFE-treated orthotopic HY24160 tumors (**i**), and quantification of CD8 (**j**) and granzyme B (**k**) signals. Scale bars, 50  $\mu\text{m}$ .

**l** and **m**, Flow cytometric analysis of cell-surface PD-L1 and MHC-I (H-2K<sup>b</sup>) levels in tumor cells collected from mice treated with isotype control IgG (**l**) or anti-CD8 antibody (**m**). MFI: mean fluorescence intensity.

**n**, qPCR analysis of *Pd-1l*, *H-2k*, *H-2d*, and *B2m* in vehicle- and MIFE-treated orthotopic HY24160 tumors.

**o**, qPCR analysis of known GR-activated target genes (*Klf9*, *Snai2*, and *Fn1*) in vehicle- and MIFE-treated orthotopic HY24160 tumors.

Statistical significance in **c**, **d**, **g**, **h**, and **j-o** was determined by a two-tailed unpaired *t*-test. Error bars are s.e.m. Source data are provided as a Source Data file.

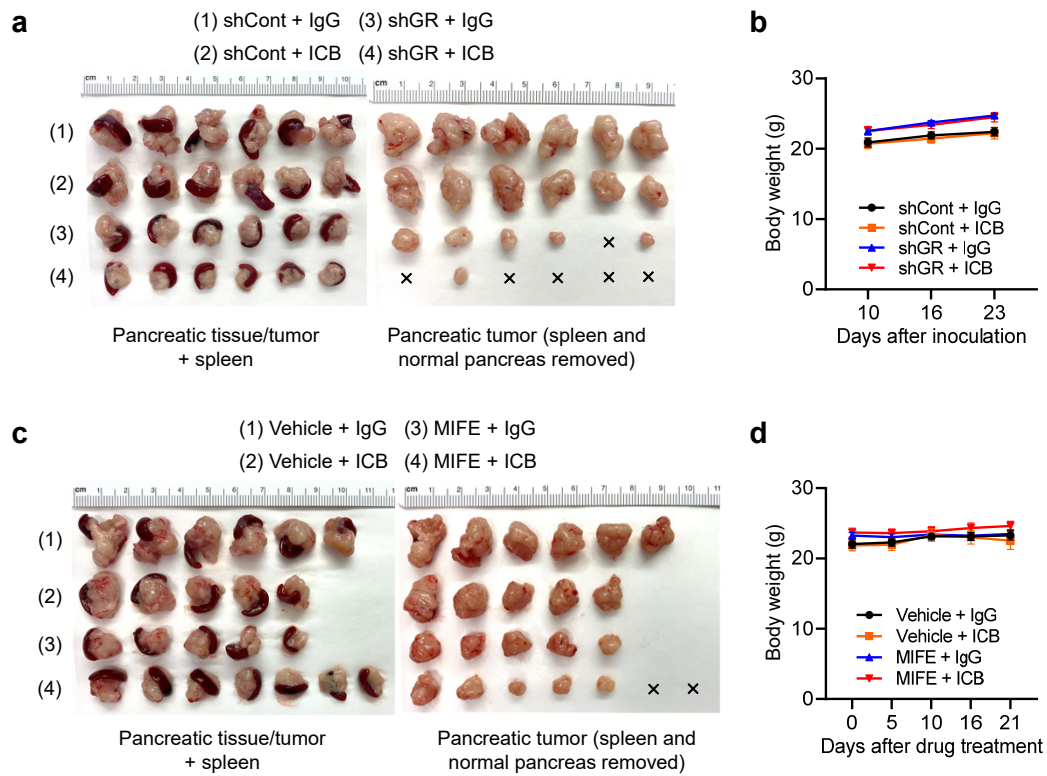

**Supplementary Fig. 6. Effect of GR depletion or inhibition on the immunotherapeutic response of the KPC line HY24409.**

**a**, Endpoint images of orthotopic HY24409 tumors expressing either control shRNA or GR shRNA, with or without dual ICB (anti-PD1 and anti-CTLA-4 monoclonal antibodies) treatment.  $n = 6$  mice per group. Related to **Fig. 6d**.

**b**, Body weight of the mice described in **a**.

**c**, Endpoint images of orthotopic HY24409 tumors from C57BL/6 mice treated with mifepristone (MIFE) and dual ICB (anti-PD1 and anti-CTLA-4 monoclonal antibodies), alone or in combination.  $n = 5-7$  mice per group. Related to **Fig. 6h**.

**d**, Body weight of the mice described in **c**.

Source data are provided as a Source Data file.

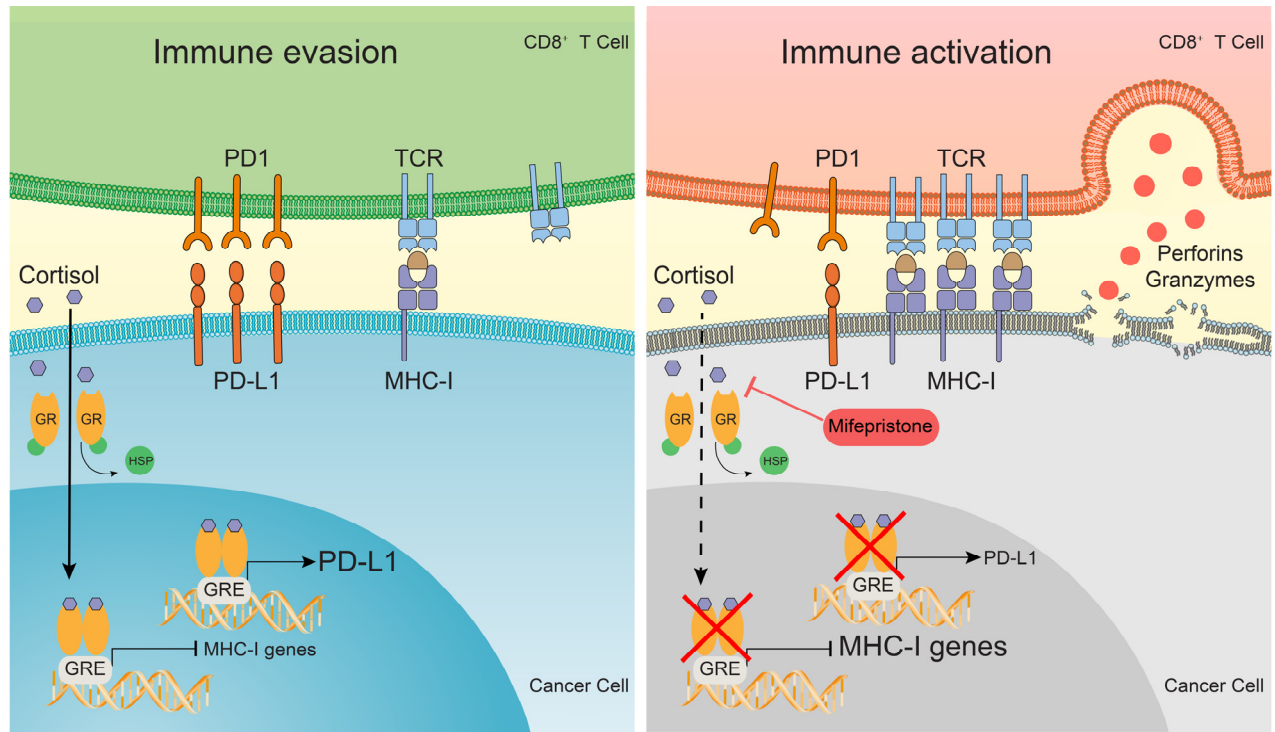

**Supplementary Fig. 7. Model for the immunosuppressive effects of tumoral GR on the tumor microenvironment of pancreatic cancer.** PD-1: programmed death-1. PD-L1: programmed death ligand-1. TCR: T cell receptor. MHC-I: major histocompatibility complex class I. HSP: heat shock protein. GRE: glucocorticoid response element.

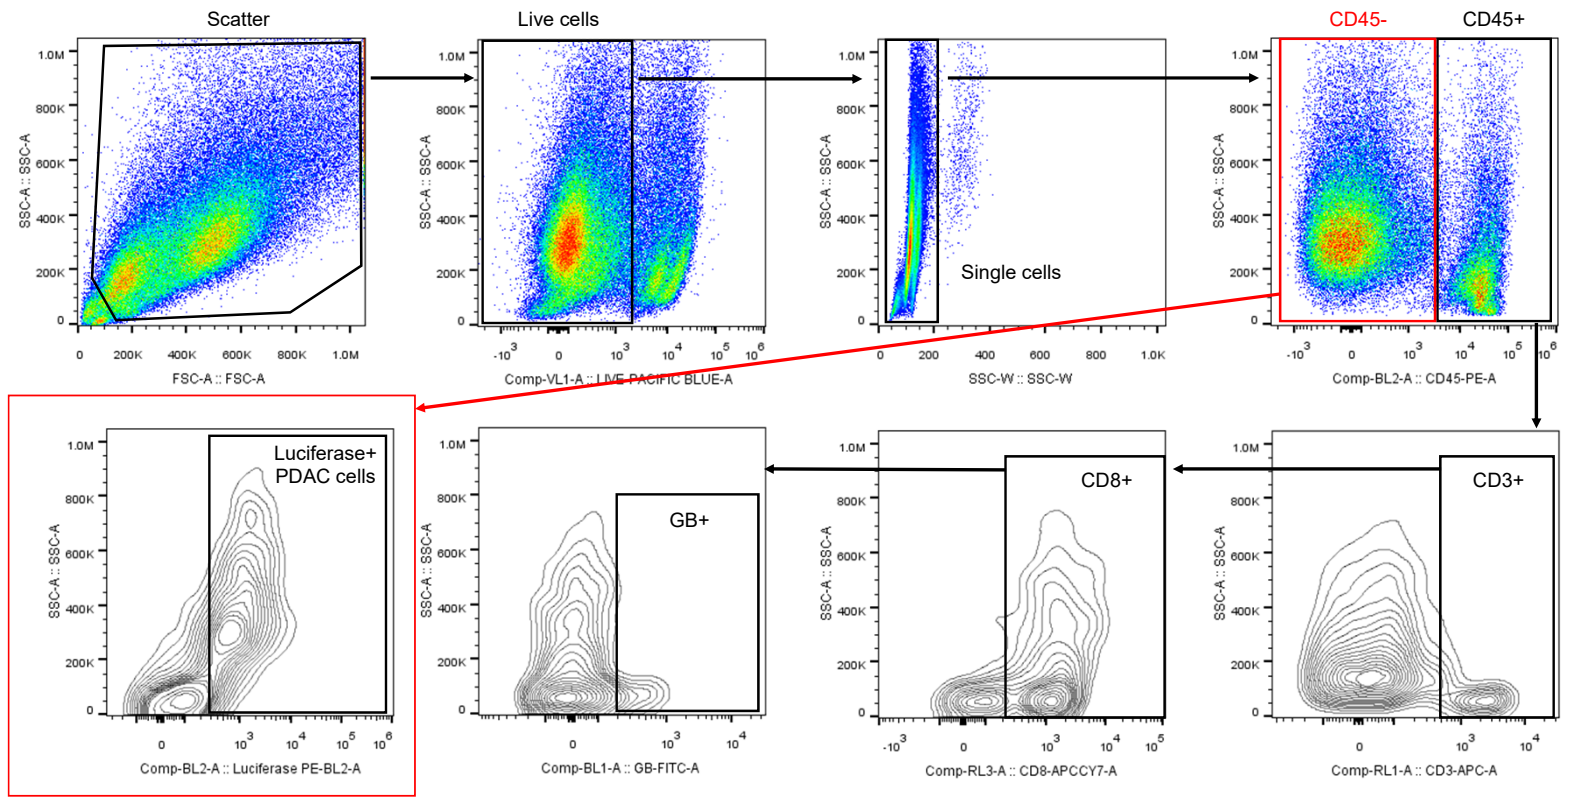

Supplementary Fig. 8. Gating strategies for flow cytometry analysis.

Figure 1c

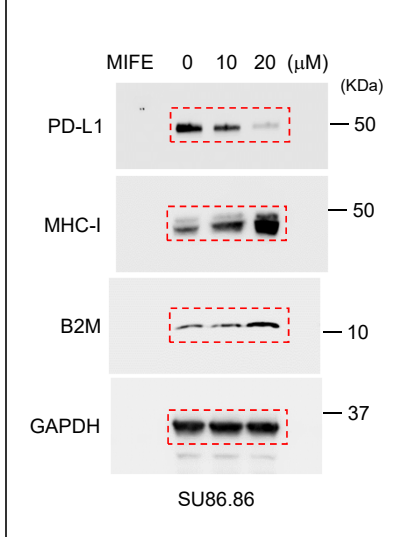

Figure 1h

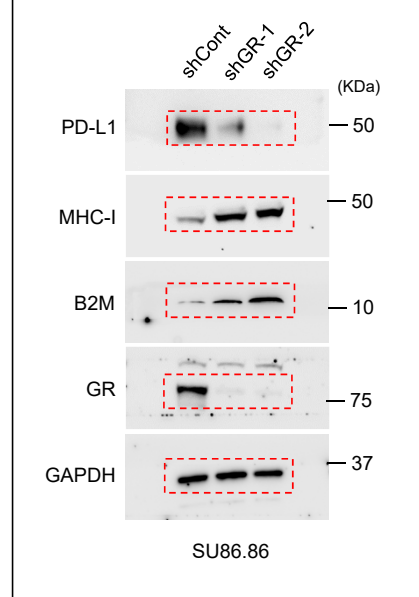

Figure 1m

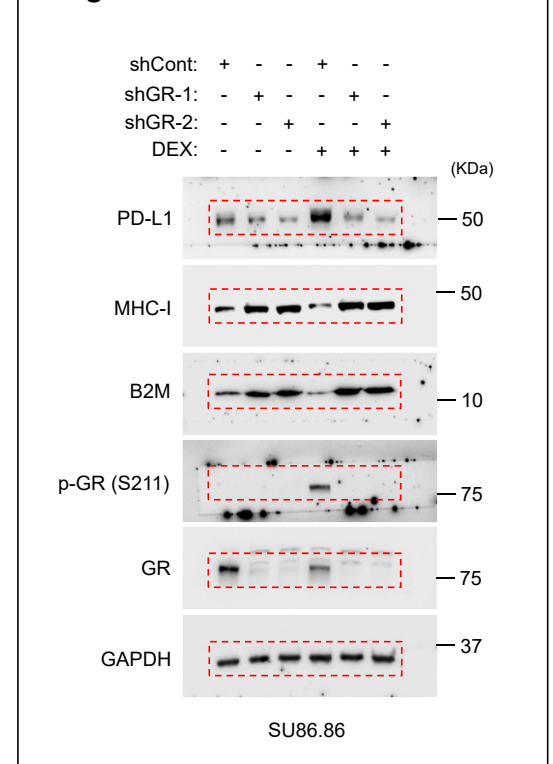

Figure 2a

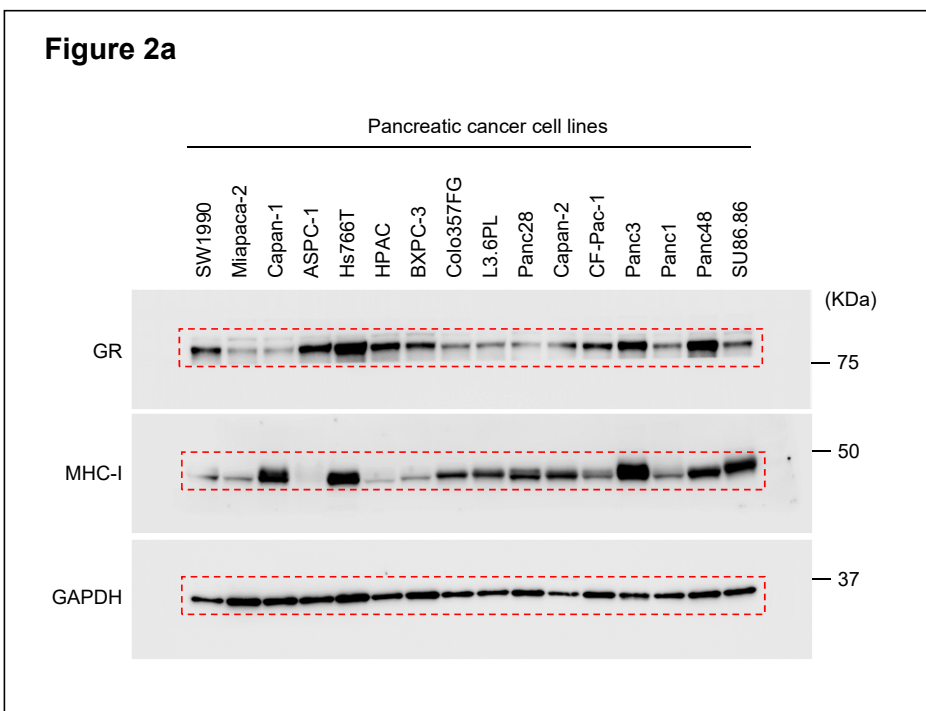

Figure 2f

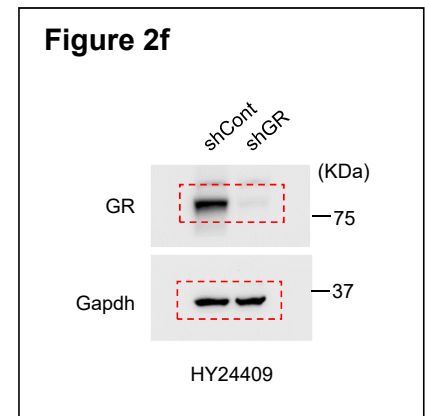

Figure 2d

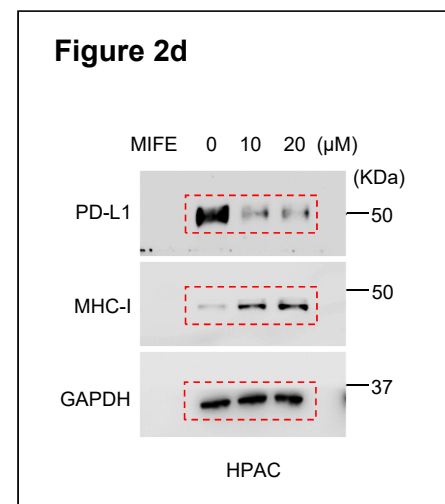

Figure 2e

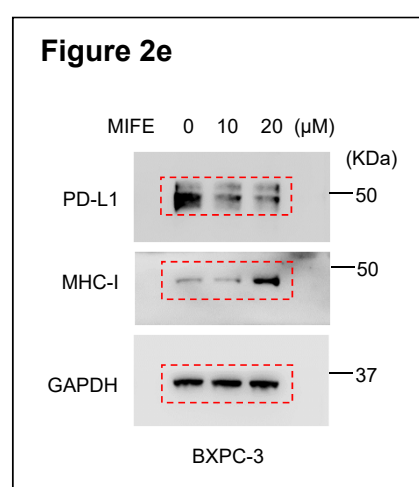

Figure 2i

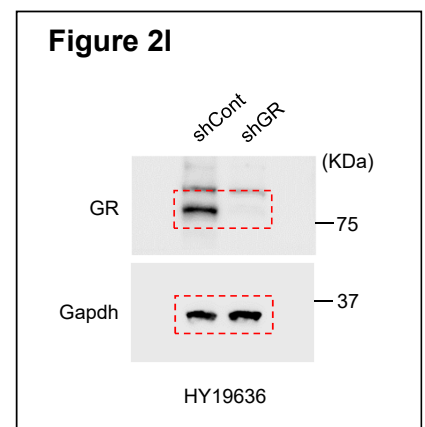



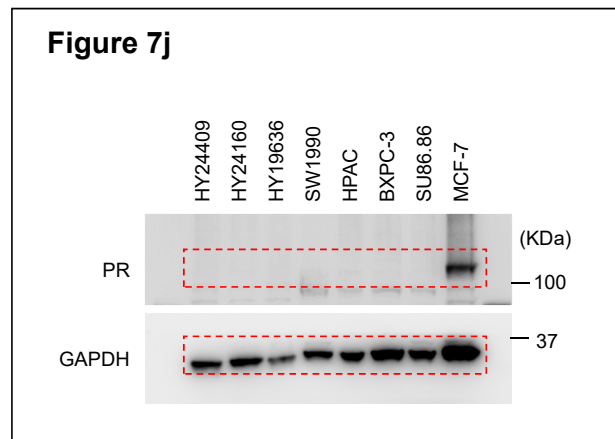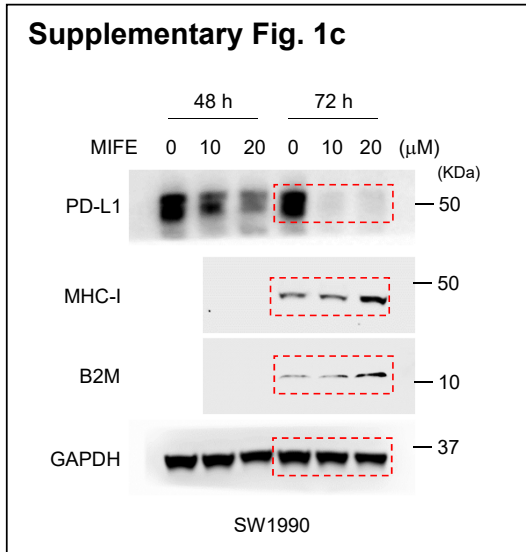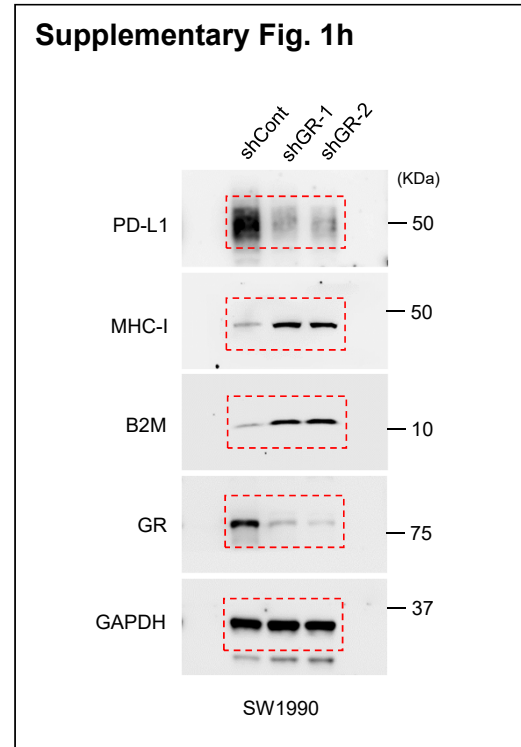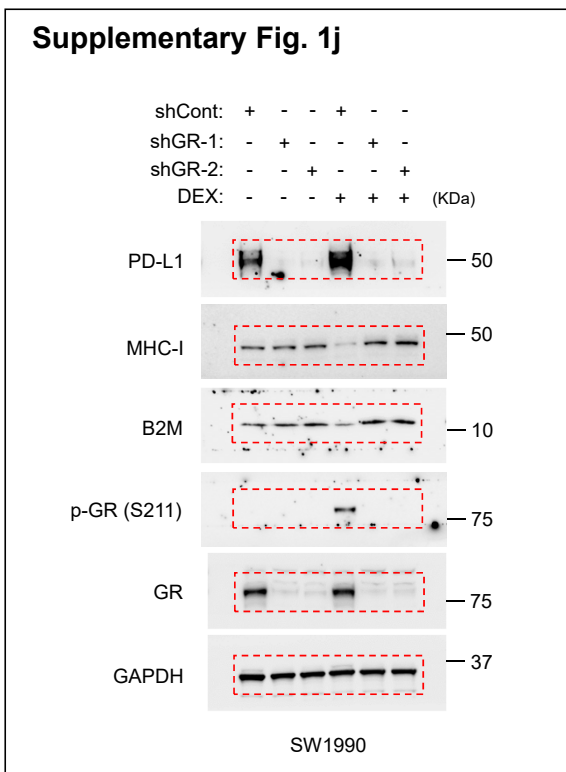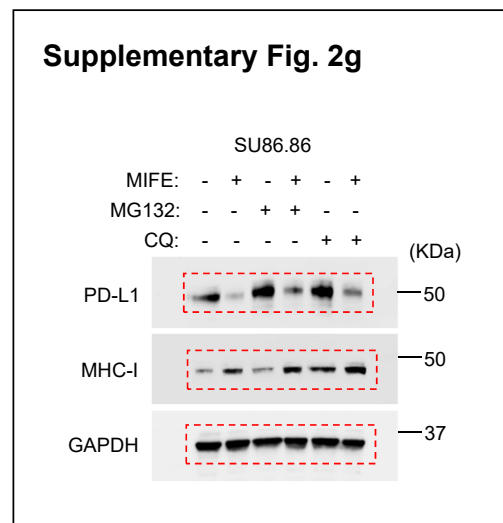

## Supplementary Tables

**Supplementary Table 1. Antibodies used for CyTOF analysis**

For HY24409 tumors:

| Target            | Label | Intracellular staining | Clone#      | Dilution ratio | Source                    | Catalog# |
|-------------------|-------|------------------------|-------------|----------------|---------------------------|----------|
| CD11b             | 139La | FALSE                  | M1/70       | 1:500          | BioLegend                 | 101249   |
| CD11c             | 142Nd | FALSE                  | N418        | 1:400          | BioLegend                 | 117302   |
| CD19              | 149Sm | FALSE                  | 4D5         | 1:400          | BioLegend                 | 115502   |
| CD25              | 150Nd | FALSE                  | 3C7         | 1:200          | BioLegend                 | 101902   |
| CD3, CD3e         | 152Sm | FALSE                  | 145-2C11    | 1:500          | BioLegend                 | 100302   |
| CD4(Ms)           | 115In | FALSE                  | RM4-5       | 1:500          | BioLegend                 | 100506   |
| CD45(Ms)          | 89Y   | FALSE                  | 30-F11      | 1:400          | DVS-Fluidigm              | 3089005B |
| CD8a              | 146Nd | FALSE                  | 53-6.7      | 1:500          | BioLegend                 | 100702   |
| F4/80             | 171Yb | FALSE                  | D2S9R       | 1:400          | Cell Signaling Technology | 70076BF  |
| Foxp3             | 158Gd | TRUE                   | FJK-16s     | 1:500          | DVS-Fluidigm              | 3158003A |
| I-A/I-E, MHC-II   | 209Bi | FALSE                  | M5/114.15.2 | 1:1000         | DVS-Fluidigm              | 3209006B |
| Ly-6G/Ly-6C, Gr-1 | 141Pr | FALSE                  | RB6-8C5     | 1:800          | BioLegend                 | 108402   |
| NK1.1             | 170Er | FALSE                  | PK136       | 1:400          | BioLegend                 | 108702   |

For HY24160 tumors:

| Target          | Label | Intracellular staining | Clone       | Dilution ratio | Source       | Catalog# |
|-----------------|-------|------------------------|-------------|----------------|--------------|----------|
| CD45(Ms)        | 89Y   | FALSE                  | 30-F11      | 1:400          | DVS-Fluidigm | 3089005B |
| CD3, CD3e       | 152Sm | FALSE                  | 145-2C11    | 1:500          | BioLegend    | 100302   |
| CD8a            | 146Nd | FALSE                  | 53-6.7      | 1:500          | BioLegend    | 100702   |
| CD4(Ms)         | 115In | FALSE                  | RM4-5       | 1:500          | BioLegend    | 100506   |
| F4/80           | 173Yb | FALSE                  | BM8         | 1:400          | BioLegend    | 123102   |
| CD11b           | 139La | FALSE                  | M1/70       | 1:500          | BioLegend    | 101249   |
| Ly-6C           | 162Dy | FALSE                  | HK1.4       | 1:600          | DVS-Fluidigm | 3162014B |
| Ly-6G           | 141Pr | FALSE                  | 1A8         | 1:400          | DVS-Fluidigm | 3141008B |
| CD25            | 150Nd | FALSE                  | 3C7         | 1:200          | BioLegend    | 101902   |
| Foxp3           | 158Gd | TRUE                   | FJK-16s     | 1:500          | DVS-Fluidigm | 3158003A |
| CD19            | 149Sm | FALSE                  | 4D5         | 1:400          | BioLegend    | 115502   |
| CD11c           | 142Nd | FALSE                  | N418        | 1:400          | BioLegend    | 117302   |
| NK1.1           | 170Er | FALSE                  | PK136       | 1:400          | BioLegend    | 108702   |
| I-A/I-E, MHC-II | 209Bi | FALSE                  | M5/114.15.2 | 1:1000         | DVS-Fluidigm | 3209006B |



**Supplementary Table 2. Gating methods used for CyTOF analysis**

|                          |                                                                                                            |
|--------------------------|------------------------------------------------------------------------------------------------------------|
| CD8 <sup>+</sup> T cells | CD45 <sup>+</sup> CD11b <sup>-</sup> CD3 <sup>+</sup> CD8 <sup>+</sup> CD4 <sup>-</sup>                    |
| CD4 <sup>+</sup> T cells | CD45 <sup>+</sup> CD11b <sup>-</sup> CD3 <sup>+</sup> CD8 <sup>-</sup> CD4 <sup>+</sup>                    |
| Treg cells               | CD45 <sup>+</sup> CD11b <sup>-</sup> CD3 <sup>+</sup> CD8 <sup>-</sup> CD4 <sup>+</sup> Foxp3 <sup>+</sup> |
| Gr-MDSCs                 | CD45 <sup>+</sup> CD11b <sup>+</sup> CD3 <sup>-</sup> Gr1 <sup>+</sup>                                     |
| Macrophages              | CD45 <sup>+</sup> CD11b <sup>+</sup> CD3 <sup>-</sup> Gr1 <sup>-</sup> F4/80 <sup>+</sup>                  |
| B cells                  | CD45 <sup>+</sup> CD11b <sup>+</sup> CD3 <sup>-</sup> CD19 <sup>+</sup>                                    |
| Dendritic cells          | CD45 <sup>+</sup> CD11b <sup>+</sup> CD3 <sup>-</sup> MHC-II <sup>+</sup> CD11c <sup>+</sup>               |
| NK cells                 | CD45 <sup>+</sup> CD11b <sup>+</sup> CD3 <sup>-</sup> NK1.1 <sup>+</sup>                                   |

**Supplementary Table 3. Antibodies for flow cytometry**

| Target                            | Color   | Intracellular Staining | Clone#        | Specificity | Dilution ratio | Source            | Catalog#    |
|-----------------------------------|---------|------------------------|---------------|-------------|----------------|-------------------|-------------|
| PD-L1                             | APC     | FALSE                  | 10F.9G2       | Mouse       | 1:80           | BioLegend         | 124312      |
| CD45                              | PE      | FALSE                  | 30-F11        | Mouse       | 1:100          | BioLegend         | 103106      |
| CD45                              | FITC    | FALSE                  | 30-F11        | Mouse       | 1:100          | BioLegend         | 103108      |
| CD3                               | APC     | FALSE                  | 145-2C11      | Mouse       | 1:40           | BioLegend         | 100312      |
| CD8                               | APC-Cy7 | FALSE                  | 53-6.7        | Mouse       | 1:40           | BioLegend         | 100714      |
| CD4                               | FITC    | FALSE                  | GK1.5         | Mouse       | 1:80           | BioLegend         | 100406      |
| B2M                               | APC     | FALSE                  | A16041A       | Mouse       | 1:40           | BioLegend         | 154506      |
| B2M                               | PE      | FALSE                  | A16041A       | Mouse       | 1:40           | BioLegend         | 154504      |
| H-2K <sup>b</sup>                 | PE-Cy7  | FALSE                  | AF6-88.5      | Mouse       | 1:80           | BioLegend         | 116520      |
| H-2K <sup>b</sup>                 | APC     | FALSE                  | AF6-88.5      | Mouse       | 1:80           | BioLegend         | 116518      |
| H-2K <sup>b</sup> /D <sup>b</sup> | -       | FALSE                  | 28-8-6        | Mouse       | 1:200          | BioLegend         | 114602      |
| Luciferase                        | PE      | TRUE                   | Luci 21 1-107 | -           | 1:200          | Novus Biologicals | NB600-307PE |
| HLA-A/B/C                         | PE      | FALSE                  | W6/32         | Human       | 1:40           | BioLegend         | 311406      |
| HLA-A/B/C                         | PE-Cy5  | FALSE                  | G46-2.6       | Human       | 1:10           | BD                | 555554      |
| B2M                               | FITC    | FALSE                  | 2M2           | Human       | 1:40           | BioLegend         | 316304      |
| PD-L1                             | APC     | FALSE                  | 29E.2A3       | Human       | 1:40           | BioLegend         | 329708      |
| IL-2                              | PE      | TRUE                   | JES6-5H4      | Mouse       | 1:40           | BioLegend         | 503807      |
| TNF $\alpha$                      | PE      | TRUE                   | MP6-XT22      | Mouse       | 1:80           | BioLegend         | 506305      |
| IFN $\gamma$                      | PE-Cy7  | TRUE                   | XMG1.2        | Mouse       | 1:40           | BioLegend         | 505825      |
| PD-1                              | PE-Cy7  | FALSE                  | 29F.1A12      | Mouse       | 1:80           | BioLegend         | 135215      |
| LAG-3                             | PE      | FALSE                  | C9B7W         | Mouse       | 1:40           | BioLegend         | 125207      |
| Tim-3                             | PE      | FALSE                  | RMT3-23       | Mouse       | 1:80           | BioLegend         | 119703      |

**Supplementary Table 4. Primers for luciferase reporter plasmid construction**

| <b>Gene name</b> | <b>Forward primer (5' to 3')</b>            | <b>Reverse primer (5' to 3')</b>     |
|------------------|---------------------------------------------|--------------------------------------|
| <i>B2M</i>       | tttctctatcgataggtcatgtttgtagacttcccaaattgcc | ccggaatgccaagctaactggagaaggaagtcacgg |
| <i>HLA-B</i>     | tttctctatcgatagggcagctaaaactgggtaat         | ccggaatgccaagctgcgtctgaggagactctgagt |
| <i>HLA-C</i>     | tttctctatcgatagaaccataaaaattcatttcctaggggt  | ccggaatgccaagctgagagcagcaggaggaggg   |

### Supplementary Table 5. Primers for qPCR

For human genes:

| Gene name        | Forward primer (5' to 3') | Reverse primer (5' to 3') |
|------------------|---------------------------|---------------------------|
| <i>CALR</i>      | TCAAGGAGCAGTTTCTGGACGG    | GCATCCTGGCTTGTCTGCAAAC    |
| <i>CANX</i>      | GCTGGTTAGATGATGAGCCTGAG   | ACACCACATCCAGGAGCTGACT    |
| <i>ERAP1</i>     | GTCTGTCAGTGTGACCCATCCT    | CTGAGCAGGATTTCCACAGGTG    |
| <i>PDIA3</i>     | GTCAGCCACTTGAAGAAGCAGG    | TAGGAACTCGGAGTGAGCCTCA    |
| <i>TAPBP</i>     | GAGCCTGTTCTCATCACCATGG    | GTAGGCAAAGCTCAAGTCCAGC    |
| <i>TAP1</i>      | GCAGTCAACTCCTGGACCACTA    | CAAGGTTCCCACTGCTTACAGC    |
| <i>TAP2</i>      | ATGCCCTTACAATAGCAGCGG     | CCAAAACCTGCGAACGGTCTGCA   |
| <i>SEC61B</i>    | CCGCACAACCTCGGCAGGCA      | CAGAAGCGATGAACAGAAGACTC   |
| <i>SEC61G</i>    | GCAGTTTGTTGAGCCAAGTCG     | CCAGCCGAATGGAGTCCTT       |
| <i>HLA-A</i>     | AGATACACCTGCCATGTGCAGC    | GATCACAGCTCCAAGGAGAACC    |
| <i>HLA-B</i>     | CTGCTGTGATGTGTAGGAGGAAG   | GCTGTGAGAGACACATCAGAGC    |
| <i>HLA-C</i>     | GGAGACACAGAAGTACAAGCGC    | ACATCCTCTGGAGGGTGTGAGA    |
| <i>B2M</i>       | CCACTGAAAAAGATGAGTATGCCT  | CCAATCCAAATGCGGCATCTTCA   |
| <i>GAPDH</i>     | AAGGTGAAGGTCGGAGTCAAC     | GAAGGGGTCATTGATGGCAAC     |
| <i>CD86</i>      | CCATCAGCTTGTCTGTTTCATTCC  | GCTGTAATCCAAGGAATGTGGTC   |
| <i>ICOSL</i>     | GTTTCACTGCCTGGTGTGAGC     | ACGACGGGCACGCTGAAGTTTG    |
| <i>CD276</i>     | CTGGCTTTCGTGTGCTGGAGAA    | GCTGTCAGAGTGTTCAGAGGC     |
| <i>B7H4</i>      | CTCACAGATGCTGGCACCTACA    | GCAAGGTCTCTGAGCTGGCATT    |
| <i>CD200</i>     | CCTGGAGGATGAAGGGTGTTAC    | AGTGAAGGGATACTATGGGCTGT   |
| <i>CD70</i>      | TTCGCACAGGCTCAGCAGCAG     | TTGTCCAGCTCTGGTCCATGCA    |
| <i>CD274</i>     | TGCCGACTACAAGCGAATTACTG   | CTGCTTGTCCAGATGACTTCGG    |
| <i>PDL2</i>      | CTCGTTCACATACCTCAAGTCC    | CTGGAACCTTTAGGATGTGAGTG   |
| <i>CD155</i>     | CACTGTCACCAGCCTCTGGATA    | TCATAGCCAGAGATGGATACCTC   |
| <i>GALECTIN9</i> | ACACCCAGATCGACAACCTCCTG   | CAAACAGGTGCTGACCATCCAC    |
| <i>CD47</i>      | TATCCTCGCTGTGGTTGGACTG    | TAGTCCAAGTAATTGTGCTAGAGC  |
| <i>CEACAM1</i>   | CACGCCAATAACTCAGTCACTGG   | TTGTGGAGCAGGTCAGGTTTAC    |
| <i>BTN2A1</i>    | TCTTCATGGTCACCACGGCTGT    | ACAGGGAGACACACTGGGCATA    |
| <i>TL1A</i>      | CACCACATACCTGCTTGTGACG    | TCTCCGTCTGCTCTAAGAGGTG    |
| <i>CD137L</i>    | GGCTGGAGTCTACTATGTCTTCT   | ACCTCGGTGAAGGGAGTCC       |
| <i>CD80</i>      | AAACTCGCATCTACTGGCAAA     | GGTTCTTGTACTCGGGCCATA     |
| <i>HVEM</i>      | GTGCAGTCCAGGTTATCGTGT     | CACTTGCTTAGGCCATTGAGG     |
| <i>CD48</i>      | GGCAGGGTCAGACTTGATCC      | GTAGGTGCTGTTGTCCTCTTTC    |
| <i>B7H7</i>      | TACAAAGGCAGTGACCATTTGG    | AGGTGTAATTCCTTCGTCCAGA    |
| <i>VISTA</i>     | AGATGCACCATCCAAGTGTGG     | AGGCAGAGGATTCCTACGATGC    |
| <i>IDO</i>       | GCCTGATCTCATAGAGTCTGGC    | TGCATCCCAGAACTAGACGTGC    |
| <i>TDO</i>       | TACCCTGCCCGAGTCTTCTG      | TGGTGGTAGGTGTAGGGGTTT     |
| <i>SIGLECT15</i> | CGCGGATCGTCAACATCTC       | GTTCCGGCGGTCACTAGGTG      |
| <i>CD252</i>     | CCAGGCCAAGATTTCGAGAGG     | CCGATGTGATACCTGAAGAGCA    |
| <i>GITRL</i>     | AGTGGCTCCAATGCAAACCTA     | TATACAGCCGCACCTCAAAGG     |
| <i>NR3C1</i>     | TGCCGCTATCGAAAATGTCTT     | GGGTAGGGGTGAGTTGTGGT      |

For mouse genes:

| <b>Gene name</b> | <b>Forward primer (5' to 3')</b> | <b>Reverse primer (5' to 3')</b> |
|------------------|----------------------------------|----------------------------------|
| <i>Cd274</i>     | TGCGGACTACAAGCGAATCACG           | CTCAGCTTCTGGATAACCCTCG           |
| <i>B2m</i>       | ACAGTTCACCCGCCTCACATT            | TAGAAAGACCAGTCCTTGCTGAAG         |
| <i>H-2k</i>      | GGCAATGAGCAGAGTTTCCGAG           | CCACTTCACAGCCAGAGATCAC           |
| <i>H-2d</i>      | TGAGGAACCTGCTCGGCTACTA           | GGTCTTCGTTCAGGGCGATGTA           |
| <i>Fn1</i>       | CCCTATCTCTGATACCGTTGTCC          | TGCCGCAACTACTGTGATTCCGG          |
| <i>Klf9</i>      | CTACAGTGGCTGTGGGAAAGTC           | CTCATCCGAGCGCGAGAACTTT           |
| <i>Snai2</i>     | TCTGTGGCAAGGCTTTCTCCAG           | TGCAGATGTGCCCTCAGGTTTG           |
| <i>Nr3c1</i>     | CCGGGTCCCCAGGTAAAGA              | TGTCCGGTAAAATAAGAGGCTTG          |
| <i>Gapdh</i>     | AGGTCGGTGTGAACGGATTTG            | TGTAGACCATGTAGTTGAGGTCA          |

**Supplementary Table 6. Primers for ChIP-qPCR**

| <b>Gene name</b> | <b>Primer pair</b> | <b>Range</b> | <b>Forward primer (5' to 3')</b> | <b>Reverse primer (5' to 3')</b> |
|------------------|--------------------|--------------|----------------------------------|----------------------------------|
| <i>PD-L1</i>     | #1                 | -1057 ~ -907 | CCAATGCAAGGGCTATCTCAA            | CACCGTGCCTGTGTGC                 |
| <i>PD-L1</i>     | #2                 | -931 ~ -813  | AAAAGGGAGCACACAGGCAC             | AGTATTATCCCGCGCTGAAC             |
| <i>PD-L1</i>     | #3                 | -837 ~ -709  | AGAAGTTCAGCGCGGGATAA             | GGCTGCGGAAGCCTATTCT              |
| <i>PD-L1</i>     | #4                 | -663 ~ -569  | AAGATGTAGCTCGGGATGGGA            | ATCGTGGATTCTGTGACTTCC            |
| <i>PD-L1</i>     | #5                 | -590 ~ -474  | GGAAGTCACAGAATCCACGA             | AAAGTCAGCAGCAGACCCAT             |
| <i>PD-L1</i>     | #6                 | -335 ~ -237  | GTGCGTTCAGATGTTGGCTT             | ATTTTCACCGGGAAGAGTTTCG           |
| <i>PD-L1</i>     | #7                 | -148 ~ -65   | CTAAACTGAAAGCTTCCGCCG            | CTCTGCCCAAGGCAGCAAATC            |
| <i>HLA-A</i>     | #1                 | -980 ~ -884  | TGAGGGGTTTCTCCACCAT              | CTCGGCCTCCCAAAGTGT               |
| <i>HLA-A</i>     | #2                 | -700 ~ -600  | GCCACTGTACCCACGCCT               | GCTCACCAGCGTTCTTTCCT             |
| <i>HLA-A</i>     | #3                 | -481 ~ -374  | CAAAATGAAAACACAGCTTTTGG          | GGCAAAACAACACACATTTATCT          |
| <i>HLA-A</i>     | #4                 | -271 ~ -174  | TGTGATGCAATTTAATACTC             | ACTTGAGCATATGAGGGGAT             |
| <i>HLA-B</i>     | #1                 | -913 ~ -792  | ATTGGGACTGCATGGAGCACT            | TTCCCTGTGTGAGTCCAGAAC            |
| <i>HLA-B</i>     | #2                 | -746 ~ -667  | TACAGATCCACAGTCTGGGAAA           | AAAAGACCTGTGTCAAAACAGCAT         |
| <i>HLA-B</i>     | #3                 | -689 ~ -573  | GCTGTTTTGACACAGGTCTTTTAC         | AGGGATTCTCATAGAGACCAGTT          |
| <i>HLA-B</i>     | #4                 | -339 ~ -258  | CTGGTTTCCACAGACAGATCCT           | TGATCCCTCTTCTCCTACACCA           |
| <i>HLA-C</i>     | #1                 | -979 ~ -859  | AAGAGCATTGGGACTGCATGG            | GTGTGAGTCCAGAACATCTCC            |
| <i>HLA-C</i>     | #2                 | -815 ~ -717  | ACCCAGAGTCACAGAACCAT             | ATTCCAATCTGTGAAAGACCTGTG         |
| <i>HLA-C</i>     | #3                 | -699 ~ -586  | ACCAATATTGTGCTACCTACTGT          | AGGAGTTTTCTCTTTAAACCTGGTG        |
| <i>HLA-C</i>     | #4                 | -511 ~ -400  | AGTCCAAGGGGAGAGGTAAGTTT          | GTCCCTGAACTGGACTCCCTG            |
| <i>HLA-C</i>     | #5                 | -354 ~ -257  | TTGGGGTCTCTCCCTGGTTTC            | TCCTGATCCCTCTTCTCCTACA           |
| <i>B2M</i>       | #1                 | -982 ~ -864  | ACTAAAATTGCCGAGCCCTTTG           | CCATTCATTTTATGGACAGGGGA          |
| <i>B2M</i>       | #2                 | -612 ~ -537  | ACAGCAAGGACATAGGGAGG             | TGCTTCTTGATCCCTTCAGGA            |
| <i>B2M</i>       | #3                 | -518 ~ -448  | AGGACCTTCTCTGAGCTGTC             | GGGTTTCTCCATTCTCTGGGT            |
| <i>B2M</i>       | #4                 | -419 ~ -324  | ACAGAAGTCTCTTCTGCTAGG            | AGTTAACTGCTCGGACCTGC             |
| <i>B2M</i>       | #5                 | -347 ~ -238  | AATGCAGGTCCGAGCAGTTA             | TCAGGCTGGAGGCACATTAAG            |

**Supplementary Table 7. Mouse chemokine array coordinates**

| <b>Coordinate</b> | <b>Analyte/Control</b>      | <b>Entrez Gene ID</b> | <b>Alternate Nomenclature</b> |
|-------------------|-----------------------------|-----------------------|-------------------------------|
| A1, A2, A19,      | Reference Spots             | N/A                   |                               |
| B3, B4            | 6Ckine                      | 18829                 | CCL21, SLC, Exodus-2          |
| B5, B6            | BLC                         | 55985                 | CXCL13, BCA-1                 |
| B7, B8            | C10                         | 20305                 | CCL6, MRP-1                   |
| B9, B10           | Complement Component C5/C5a | 15139                 | C5/C5a                        |
| B11, B12          | CCL28                       | 56838                 | MEC                           |
| B13, B14          | Chemerin                    | 71660                 | RARRES2                       |
| B15, B16          | CTACK                       | 20301                 | CCL27, ALP, ILC, ESkin        |
| B17, B18          | CXCL16                      | 66102                 | SRPSOX                        |
| C3, C4            | Eotaxin                     | 20292                 | CCL11                         |
| C5, C6            | Fractalkine                 | 20312                 | CX3CL1                        |
| C7, C8            | IL-16                       | 16170                 |                               |
| C9, C10           | IP-10                       | 15945                 | CXCL10, CRG-2, C7             |
| C11, C12          | I-TAC                       | 56066                 | CXCL11, H174, SCYB9B          |
| C13, C14          | JE                          | 20296                 | CCL2, MCP-1                   |
| C15, C16          | KC                          | 14825                 | CXCL1                         |
| C17, C18          | LIX                         | 20311                 | GCP-2, ENA-78                 |
| D3, D4            | MCP-2                       | 20307                 | CCL8, HC14                    |
| D5, D6            | MCP-5                       | 20293                 | CCL12                         |
| D7, D8            | MDC                         | 20299                 | CCL22, ABCD-1                 |
| D9, D10           | MIG                         | 17329                 | CXCL9, CRG-10, CMK            |
| D11, D12          | MIP-1 $\alpha/\beta$ (pan)  | 20302/20303           | CCL3/CCL4                     |
| D13, D14          | MIP-1 $\gamma$              | 20308                 | CCL9/10, CCF18, MRP-2         |
| D15, D16          | MIP-2                       | 20310                 | CXCL2, GRO $\beta$ , GRO2,    |
| D17, D18          | RANTES                      | 20304                 | CCL5, SISd                    |
| E3, E4            | SDF-1                       | 20315                 | CXCL12, PBSF                  |
| E5, E6            | Complement Factor D (Sample | 11537                 | Adipsin, DF, Adn              |
| E7, E8            | gp130 (Sample Control)      | 16195                 | IL-6ST, CD130                 |
| E9, E10           | HSP60 (Sample Control)      | 15510                 | Hspd1                         |
| E11, E12          | Negative Control            | N/A                   |                               |
| F1, F2            | Reference Spots             | N/A                   |                               |
