# Supplementary material for: Glucocorticoid receptor regulates PD-L1 and MHC-I in pancreatic cancer cells to promote immune evasion and immunotherapy resistance
Source: PubMed Central journal article supplement (PMC8649069; doi:10.1038/s41467-021-27349-7), 2021-12-06
Supplement: 41467_2021_27349_MOESM2_ESM.pdf [file 41467_2021_27349_MOESM2_ESM.pdf]

## Reporting Summary

Nature Portfolio wishes to improve the reproducibility of the work that we publish. This form provides structure for consistency and transparency in reporting. For further information on Nature Portfolio policies, see our [Editorial Policies](#) and the [Editorial Policy Checklist](#).

### Statistics

For all statistical analyses, confirm that the following items are present in the figure legend, table legend, main text, or Methods section.

n/a Confirmed

- The exact sample size ( $n$ ) for each experimental group/condition, given as a discrete number and unit of measurement
- A statement on whether measurements were taken from distinct samples or whether the same sample was measured repeatedly
- The statistical test(s) used AND whether they are one- or two-sided  
*Only common tests should be described solely by name; describe more complex techniques in the Methods section.*
- A description of all covariates tested
- A description of any assumptions or corrections, such as tests of normality and adjustment for multiple comparisons
- A full description of the statistical parameters including central tendency (e.g. means) or other basic estimates (e.g. regression coefficient) AND variation (e.g. standard deviation) or associated estimates of uncertainty (e.g. confidence intervals)
- For null hypothesis testing, the test statistic (e.g.  $F$ ,  $t$ ,  $r$ ) with confidence intervals, effect sizes, degrees of freedom and  $P$  value noted  
*Give  $P$  values as exact values whenever suitable.*
- For Bayesian analysis, information on the choice of priors and Markov chain Monte Carlo settings
- For hierarchical and complex designs, identification of the appropriate level for tests and full reporting of outcomes
- Estimates of effect sizes (e.g. Cohen's  $d$ , Pearson's  $r$ ), indicating how they were calculated

*Our web collection on [statistics for biologists](#) contains articles on many of the points above.*

### Software and code

Policy information about [availability of computer code](#)

**Data collection** Flow cytometry data were collected using the Invitrogen Attune NxT Acoustic Focusing Cytometer. Quantitative PCR data were obtained with the Bio-Rad CFX96 Real-Time System. Fluorescent images were obtained using the Vectra Polaris Automated Quantitative Pathology Imaging System. Immunoblotting images were obtained using the ChemiDoc Touch Imaging System (Bio-Rad) and Image Lab Touch software (Bio-Rad, version 2.3.0.07). IHC images were obtained using a fully automated digital pathology slide-system (KFBIO, KF-PRO-005).

**Data analysis** Flow cytometry data were analysed using FlowJo (FlowJo, version 10.4). Immunofluorescent images were analyzed using ImageJ (version 1.52p) or Phenochart (version 1.0.12). Statistical analysis was performed using Graphpad Prism (GraphPad software, version 8). CyTOF data were analyzed using Cytobank (<https://premium.cytobank.org/cytobank/login>). The correlation of expression levels of two genes was analyzed using the R corrplot package and the cor function. Survival analysis was performed using the R survival package.

For manuscripts utilizing custom algorithms or software that are central to the research but not yet described in published literature, software must be made available to editors and reviewers. We strongly encourage code deposition in a community repository (e.g. GitHub). See the Nature Portfolio [guidelines for submitting code & software](#) for further information.

### Data

Policy information about [availability of data](#)

All manuscripts must include a [data availability statement](#). This statement should provide the following information, where applicable:

- Accession codes, unique identifiers, or web links for publicly available datasets
- A description of any restrictions on data availability
- For clinical datasets or third party data, please ensure that the statement adheres to our [policy](#)

GR (encoded by NR3C1) mRNA levels in paired normal pancreatic tissue and PDAC were obtained from the dataset GSE15471 in the Gene Expression Omnibus

(<https://www.ncbi.nlm.nih.gov/geo/query/acc.cgi?acc=GSE15471>). TCGA gene expression data were obtained from The Cancer Genome Atlas data portal (<https://tcga-data.nci.nih.gov/tcga/dataAccessMatrix.htm>). The source data that support the findings of this study are available with no restrictions. The uncropped blots are shown in Supplementary Fig. 9. Source data are provided with this paper.

## Field-specific reporting

Please select the one below that is the best fit for your research. If you are not sure, read the appropriate sections before making your selection.

Life sciences  Behavioural & social sciences  Ecological, evolutionary & environmental sciences

For a reference copy of the document with all sections, see [nature.com/documents/nr-reporting-summary-flat.pdf](https://www.nature.com/documents/nr-reporting-summary-flat.pdf)

## Life sciences study design

All studies must disclose on these points even when the disclosure is negative.

|                 |                                                                                                                                                                                                                                                                                                                                                                     |
|-----------------|---------------------------------------------------------------------------------------------------------------------------------------------------------------------------------------------------------------------------------------------------------------------------------------------------------------------------------------------------------------------|
| Sample size     | No sample size calculation was done either for in vitro or in vivo studies. For in vivo and in vitro studies, sample sizes were determined based on our preliminary experiments. In our experience, n = 5-7 mice per group (in vivo) and n = 3-4 samples per group (in vitro) are sufficient to detect meaningful biological differences with good reproducibility. |
| Data exclusions | No data or animals were excluded from analysis.                                                                                                                                                                                                                                                                                                                     |
| Replication     | Except for the animal studies (one time), chemokine array analysis (one time), and tissue microarray analysis (one time), each experiment was repeated at least three times with similar results.                                                                                                                                                                   |
| Randomization   | Mice were randomly assigned to different treatment groups.                                                                                                                                                                                                                                                                                                          |
| Blinding        | For cell-based experiments, Western blotting, flow cytometry, and in vitro assays, blinding was not performed, because the investigator had to know the groups to load the samples or perform the assay. Blinding was not performed in mouse experiments. The investigator needed to know the treatment groups in order to perform the study.                       |

## Reporting for specific materials, systems and methods

We require information from authors about some types of materials, experimental systems and methods used in many studies. Here, indicate whether each material, system or method listed is relevant to your study. If you are not sure if a list item applies to your research, read the appropriate section before selecting a response.

### Materials & experimental systems

| n/a                                 | Involved in the study                                           |
|-------------------------------------|-----------------------------------------------------------------|
| <input type="checkbox"/>            | <input checked="" type="checkbox"/> Antibodies                  |
| <input type="checkbox"/>            | <input checked="" type="checkbox"/> Eukaryotic cell lines       |
| <input checked="" type="checkbox"/> | <input type="checkbox"/> Palaeontology and archaeology          |
| <input type="checkbox"/>            | <input checked="" type="checkbox"/> Animals and other organisms |
| <input type="checkbox"/>            | <input checked="" type="checkbox"/> Human research participants |
| <input checked="" type="checkbox"/> | <input type="checkbox"/> Clinical data                          |
| <input checked="" type="checkbox"/> | <input type="checkbox"/> Dual use research of concern           |

### Methods

| n/a                                 | Involved in the study                              |
|-------------------------------------|----------------------------------------------------|
| <input checked="" type="checkbox"/> | <input type="checkbox"/> ChIP-seq                  |
| <input type="checkbox"/>            | <input checked="" type="checkbox"/> Flow cytometry |
| <input checked="" type="checkbox"/> | <input type="checkbox"/> MRI-based neuroimaging    |

## Antibodies

### Antibodies used

Antibodies used for mouse experiments:  
 anti-mouse CD8 $\alpha$  antibody (200  $\mu$ g, clone 2.43, BE0061, Bio X Cell; RRID: AB\_1125541)  
 rat IgG2b isotype control (200  $\mu$ g, LTF-2, BE0090, Bio X Cell; RRID: AB\_1107780)  
 anti-mouse PD-1 antibody (100  $\mu$ g, clone RMP1-14, BPO146, Bio X Cell; RRID: AB\_10949053)  
 anti-mouse CTLA-4 antibody (100  $\mu$ g, clone UC10-4F10-11, BE0032, Bio X Cell; RRID: AB\_1107598)  
 rat IgG2a isotype control (100  $\mu$ g, clone 2A3, BE0089, Bio X Cell; RRID: AB\_1107769)  
 hamster IgG (100  $\mu$ g, Bio X Cell, BE0091; RRID: AB\_1107773)

Antibodies used for immunofluorescent staining:  
 CD3 (1:200, Cell Signaling Technology, 99940S, RRID: AB\_2755035)  
 CD8 (1:200, Cell Signaling Technology, 98941S, RRID: AB\_2756376)  
 Granzyme B (1:200, Cell Signaling Technology, 44153S, RRID: AB\_2857976)

Antibodies used for IHC:  
 GR (1:200, Sigma-Aldrich, SAB4501309, RRID: AB\_10744954)  
 PD-L1 (1:200, GeneTex, GTX01796)  
 MHC-I (1:200, Santa Cruz, sc55582, RRID: AB\_831547)

CD8 (1:100, MXB Biotechnologies, RMA-0514)

Antibodies used for immunoblotting:

GR (1:1000, Proteintech, 24050-1-AP, RRID:AB\_2813890)  
 Phospho-GR (Ser211) (1:1000, Cell Signaling Technology, 4161S, RRID:AB\_2155797)  
 GAPDH (1:2000, Proteintech, 60004-1-IG, RRID:AB\_2107436)  
 PD-L1 (1:1000, Cell Signaling Technology, 13684S, RRID:AB\_2687655)  
 MHC-I (1:500, Santa Cruz Biotechnology, sc-55582, RRID:AB\_831547)  
 MHC-I (1:500, Santa Cruz Biotechnology, sc-32235, RRID:AB\_627934)  
 B2M (1:1000, Cell Signaling Technology, 12851S, RRID:AB\_2716551)  
 Phospho-STAT1 (1:1000, Cell Signaling Technology, 9167S, RRID:AB\_561284)  
 STAT1 (1:1000, Cell Signaling Technology, 14994S, RRID:AB\_2737027)  
 PR (1:1,000, Proteintech, 25871-1-AP, RRID:AB\_2880277)

Antibodies used for flow cytometry:

PD-L1: APC, 10F.9G2, 1:80, BioLegend, 124312  
 CD45: PE, 30-F11, 1:100, BioLegend, 103106  
 CD45: FITC, 30-F11, 1:100, BioLegend, 103108  
 CD3: APC, 145-2C11, 1:40, BioLegend, 100312  
 CD8: APC-Cy7, 53-6.7, 1:40, BioLegend, 100714  
 CD4: FITC, GK1.5, 1:80, BioLegend, 100406.  
 B2M: APC, A16041A, 1:40, BioLegend, 154506  
 B2M: PE, A16041A, 1:40, BioLegend, 156504  
 H-2Kb: PE-Cy7, AF6-88.5, 1:80, BioLegend, 116520  
 H-2Kb: APC, AF6-88.5, 1:80, BioLegend, 116518  
 H-2Kb/Db: 28-8-6, 1:200, BioLegend, 114602  
 Luciferase: PE, Luci 21 1-107, 1:200, Novus Biologicals, NB600-307PE  
 HLA-A/B/C: PE, W6/32, 1:40, BioLegend, 311406  
 HLA-A/B/C: PE-Cy5, G46-2.6, 1:10, BD, 555554  
 B2M: FITC, 2M2, 1:40, BioLegend, 316304  
 PD-L1: APC, 29E.2A3, 1:40, BioLegend, 329708  
 IL-2: PE, JES6-5H4, 1:40, BioLegend, 503807  
 TNF $\alpha$ : PE, MP6-XT22, 1:80, BioLegend, 506305  
 IFN $\gamma$ : PE-Cy7, XMG1.2, 1:40, BioLegend, 505825  
 PD-1: PE-Cy7, 29F.1A12, 1:80, BioLegend, 135215  
 LAG-3: PE, C9B7W, 1:40, BioLegend, 125207  
 Tim-3: PE, RMT3-23, 1:80, BioLegend, 119703

Antibodies used for CyTOF analysis

For HY24409 tumors:

CD11b 139La M1/70 1:500 BioLegend 101249  
 CD11c 142Nd N418 1:400 BioLegend 117302  
 CD19 149Sm 4D5 1:400 BioLegend 115502  
 CD25 150Nd 3C7 1:200 BioLegend 101902  
 CD3, CD3e 152Sm 145-2C11 1:500 BioLegend 100302  
 CD4(Ms) 115In RM4-5 1:500 BioLegend 100506  
 CD45(Ms) 89Y 30-F11 1:400 DVS-Fluidigm 3089005B  
 CD8a 146Nd 53-6.7 1:500 BioLegend 100702  
 F4/80 171Yb D2S9R 1:400 CST 70076BF  
 Foxp3 158Gd FJK-16s 1:500 DVS-Fluidigm 3158003A  
 I-A/I-E, MHC-II 209Bi M5/114.15.2 1:1000 DVS-Fluidigm 3209006B  
 Ly-6G/Ly-6C, Gr-1 141Pr RB6-8C5 1:800 BioLegend 108402  
 NK1.1 170Er PK136 1:400 BioLegend 108702

For HY24160 tumors:

CD45(Ms) 89Y 30-F11 1:400 DVS-Fluidigm 3089005B  
 CD3, CD3e 152Sm 145-2C11 1:500 BioLegend 100302  
 CD8a 146Nd 53-6.7 1:500 BioLegend 100702  
 CD4(Ms) 115In RM4-5 1:500 BioLegend 100506  
 F4/80 173Yb BM8 1:400 BioLegend 123102  
 CD11b 139La M1/70 1:500 BioLegend 101249  
 Ly-6C 162Dy HK1.4 1:600 DVS-Fluidigm 3162014B  
 Ly-6G 141Pr 1A8 1:400 DVS-Fluidigm 3141008B  
 CD25 150Nd 3C7 1:200 BioLegend 101902  
 Foxp3 158Gd FJK-16s 1:500 DVS-Fluidigm 3158003A  
 CD19 149Sm 4D5 1:400 BioLegend 115502  
 CD11c 142Nd N418 1:400 BioLegend 117302  
 NK1.1 170Er PK136 1:400 BioLegend 108702  
 I-A/I-E, MHC-II 209Bi M5/114.15.2 1:1000 DVS-Fluidigm 3209006B

## Validation

All antibodies used are commercially available and validated by the manufacturers. Pre-validated antibodies were purchased from reputable sources. All proteins are well studied and all antibodies are widely used in the literature. The experiments included appropriate controls. We validated the GR-specific antibody by using two independent GR shRNAs.

Antibodies used for mouse experiments:

anti-mouse CD8 $\alpha$  antibody (BE0061, Bio X Cell; RRID: AB\_1125541) <https://bxccl.com/product/m-cd8a-2/>  
 rat IgG2b isotype control (BE0090, Bio X Cell; RRID: AB\_1107780) <https://bxccl.com/product/rat-igg2b-isotype-control/>

anti-mouse PD-1 antibody (BP0146, Bio X Cell; RRID: AB\_10949053) <https://bxccl.com/product/invivoplus-anti-m-pd-1/>  
 anti-mouse CTLA-4 antibody (BE0032, Bio X Cell; RRID: AB\_1107598) <https://bxccl.com/product/m-cd152-m-ctla-4-2/>  
 rat IgG2a isotype control (BE0089, Bio X Cell; RRID: AB\_1107769) <https://bxccl.com/product/rat-igg2a-isotype-control/>  
 hamster IgG (BE0091, Bio X Cell; RRID: AB\_1107773) <https://bxccl.com/product/polyclonal-3/>

#### Antibodies used for immunofluorescent staining:

CD3 (Cell Signaling Technology, 99940S, RRID: AB\_2755035) <https://www.cellsignal.com/products/primary-antibodies/cd3e-d4v8l-rabbit-mab/99940>  
 CD8 (Cell Signaling Technology, 98941S, RRID: AB\_2756376) <https://www.cellsignal.com/products/primary-antibodies/cd8a-d4w2z-xp-rabbit-mab-mouse-specific/98941>  
 Granzyme B (Cell Signaling Technology, 44153S, RRID: AB\_2857976) <https://www.cellsignal.com/products/primary-antibodies/granzyme-b-e5v2l-rabbit-mab-mouse-specific/44153>

#### Antibodies used for IHC:

GR (Sigma-Aldrich, SAB4501309, RRID: AB\_10744954) <https://www.sigmaaldrich.com/US/en/product/sigma/sab4501309>  
 PD-L1 (GeneTex, GTX01796) <https://www.genetex.com/Product/Detail/PD-L1-antibody-ZR3/GTX01796>  
 MHC-I (Santa Cruz, sc55582, RRID: AB\_831547) <https://www.scbt.com/p/mhc-class-i-antibody-f-3>  
 CD8 (MXB Biotechnologies, RMA-0514) <http://maxim.com.cn/sitecn/dklkthdkt/7013.html>

#### Antibodies used for immunoblotting:

GR (Proteintech, 24050-1-AP, RRID: AB\_2813890) <https://www.ptglab.com/products/NR3C1-Antibody-24050-1-AP.htm>  
 Phospho-GR (Ser211) (Cell Signaling Technology, 4161S, RRID: AB\_2155797) <https://www.cellsignal.com/products/primary-antibodies/phospho-glucocorticoid-receptor-ser211-antibody/4161>  
 GAPDH (Proteintech, 60004-1-IG, RRID: AB\_2107436) <https://www.ptglab.com/products/GAPDH-Antibody-60004-1-Ig.htm>  
 PD-L1 (Cell Signaling Technology, 13684S, RRID: AB\_2687655) <https://www.cellsignal.com/products/primary-antibodies/pd-l1-e113n-xp-rabbit-mab/13684>  
 MHC-I (Santa Cruz Biotechnology, sc-55582, RRID: AB\_831547) <https://www.scbt.com/p/mhc-class-i-antibody-f-3>  
 MHC-I (Santa Cruz Biotechnology, sc-32235, RRID: AB\_627934) <https://www.scbt.com/p/mhc-class-i-antibody-w6-32>  
 B2M (Cell Signaling Technology, 12851S, RRID: AB\_2716551) <https://www.cellsignal.com/products/primary-antibodies/b2-microglobulin-d8p1h-rabbit-mab/12851>  
 Phospho-STAT1 (Cell Signaling Technology, 9167S, RRID: AB\_561284) <https://www.cellsignal.com/products/primary-antibodies/phospho-stat1-tyr701-58d6-rabbit-mab/9167>  
 STAT1 (Cell Signaling Technology, 14994S, RRID: AB\_2737027) <https://www.cellsignal.com/products/primary-antibodies/stat1-d1k9y-rabbit-mab/14994>  
 PR (Proteintech, 25871-1-AP, RRID: AB\_2880277) <https://www.ptglab.com/products/PR-Antibody-25871-1-AP.htm>

#### Antibodies used for flow cytometry:

PD-L1: BioLegend, 124312 <https://www.biolegend.com/en-us/products/apc-anti-mouse-cd274-b7-h1-pd-l1-antibody-6655?GroupID=BLG5396>  
 CD45: BioLegend, 103106 <https://www.biolegend.com/en-us/products/pe-anti-mouse-cd45-antibody-100>  
 CD45: BioLegend, 103108 <https://www.biolegend.com/en-us/products/fitc-anti-mouse-cd45-antibody-99>  
 CD3: BioLegend, 100312 <https://www.biolegend.com/en-us/products/apc-anti-mouse-cd3epsilon-antibody-21>  
 CD8: BioLegend, 100714 <https://www.biolegend.com/en-us/products/apc-cyanine7-anti-mouse-cd8a-antibody-2269>  
 CD4: BioLegend, 100406 <https://www.biolegend.com/en-us/products/fitc-anti-mouse-cd4-antibody-248>  
 B2M: BioLegend, 154506 <https://www.biolegend.com/en-us/products/apc-anti-mouse-beta2-microglobulin-antibody-15125>  
 B2M: BioLegend, 154504 <https://www.biolegend.com/en-us/products/pe-anti-mouse-beta2-microglobulin-antibody-15126>  
 H-2Kb: BioLegend, 116520 <https://www.biolegend.com/en-us/products/pe-cyanine7-anti-mouse-h-2kb-antibody-15167>  
 H-2Kb: BioLegend, 116518 <https://www.biolegend.com/en-us/products/apc-anti-mouse-h-2kb-antibody-6573>  
 H-2Kb/Db: BioLegend, 114602 <https://www.biolegend.com/en-us/products/purified-anti-mouse-h-2k-b-h-2d-b-antibody-1684>  
 Luciferase: Novus Biologicals, NB600-307PE [https://www.novusbio.com/products/luciferase-antibody-luci-21-1-107\\_nb600-307pe](https://www.novusbio.com/products/luciferase-antibody-luci-21-1-107_nb600-307pe)  
 HLA-A/B/C: BioLegend, 311406 <https://www.biolegend.com/en-us/products/pe-anti-human-hla-a-b-c-antibody-1872>  
 HLA-A/B/C: BD, 555554 <https://www.bdbiosciences.com/en-us/products/reagents/flow-cytometry-reagents/research-reagents/single-color-antibodies-ruo/pe-cy-5-mouse-anti-human-hla-abc.555554>  
 B2M: BioLegend, 316304 <https://www.biolegend.com/en-us/products/fitc-anti-human-beta2-microglobulin-antibody-3079>  
 PD-L1: BioLegend, 329708 <https://www.biolegend.com/en-us/products/apc-anti-human-cd274-b7-h1-pd-l1-antibody-4376>  
 IL-2: BioLegend, 503807 <https://www.biolegend.com/en-us/products/pe-anti-mouse-il-2-antibody-954>  
 TNF $\alpha$ : BioLegend, 506305 <https://www.biolegend.com/en-us/products/pe-anti-mouse-tnf-alpha-antibody-978>  
 IFN $\gamma$ : BioLegend, 505825 <https://www.biolegend.com/en-us/products/pe-cyanine7-anti-mouse-ifn-gamma-antibody-5865>  
 PD-1: BioLegend, 135215 <https://www.biolegend.com/en-us/products/pe-cyanine7-anti-mouse-cd279-pd-1-antibody-7005>  
 LAG-3: BioLegend, 125207 <https://www.biolegend.com/en-us/products/pe-anti-mouse-cd223-lag-3-antibody-4486>  
 Tim-3: BioLegend, 119703 <https://www.biolegend.com/en-us/products/pe-anti-mouse-cd366-tim-3-antibody-2657>

#### Antibodies used for CyTOF analysis

CD11b BioLegend 101249 <https://www.biolegend.com/en-us/products/purified-anti-mouse-human-cd11b-maxpar-ready-antibody-9159>  
 CD11c BioLegend 117302 <https://www.biolegend.com/en-us/products/purified-anti-mouse-cd11c-antibody-1817>  
 CD19 BioLegend 115502 <https://www.biolegend.com/en-us/products/purified-anti-mouse-cd19-antibody-1532>  
 CD25 BioLegend 101902 <https://www.biolegend.com/en-us/products/purified-anti-mouse-cd25-antibody-130>  
 CD3, CD3e BioLegend 100302 <https://www.biolegend.com/en-us/products/purified-anti-mouse-cd3epsilon-antibody-28>  
 CD4(Ms) BioLegend 100506 <https://www.biolegend.com/en-us/products/purified-anti-mouse-cd4-antibody-484>  
 CD45(Ms) DVS-Fluidigm 3089005B [https://store.fluidigm.com/Cytometry/ConsumablesandReagentsCytometry/MaxparAntibodies/Anti-Mouse%20CD45%20-30-F11-89Y%E2%80%944100%20Tests?cclcl=en\\_US](https://store.fluidigm.com/Cytometry/ConsumablesandReagentsCytometry/MaxparAntibodies/Anti-Mouse%20CD45%20-30-F11-89Y%E2%80%944100%20Tests?cclcl=en_US)  
 CD8a BioLegend 100702 <https://www.biolegend.com/en-us/products/purified-anti-mouse-cd8a-antibody-157>  
 F4/80 Cell Signaling Technology 70076BF <https://www.cellsignal.com/products/primary-antibodies/f4-80-d2s9r-xp-rabbit-mab/70076>  
 Foxp3 DVS-Fluidigm 3158003A [https://store.fluidigm.com/Cytometry/ConsumablesandReagentsCytometry/MaxparAntibodies/Anti-Mouse%20Foxp3%20-FJK-16s-158Gd%E2%80%94450%20Tests?cclcl=en\\_US](https://store.fluidigm.com/Cytometry/ConsumablesandReagentsCytometry/MaxparAntibodies/Anti-Mouse%20Foxp3%20-FJK-16s-158Gd%E2%80%94450%20Tests?cclcl=en_US)

I-A/I-E, MHC-II DVS-Fluidigm 3209006B <https://store.fluidigm.com/Cytometry/ConsumablesandReagentsCytometry/MaxparAntibodies/Anti-Mouse%20I-A-I-E%20-M5-114-15-2-209Bi%E2%80%94100%20Tests>  
 Ly-6G/Ly-6C, Gr-1 BioLegend 108402 <https://www.biolegend.com/en-us/products/purified-anti-mouse-ly-6g-ly-6c-gr-1-antibody-462>  
 NK1.1 BioLegend 108702 <https://www.biolegend.com/en-us/products/purified-anti-mouse-nk-1-1-antibody-432>  
 F4/80 BioLegend 123102 <https://www.biolegend.com/en-us/products/purified-anti-mouse-f4-80-antibody-4064>  
 Ly-6C DVS-Fluidigm 3162014B [https://store.fluidigm.com/Cytometry/ConsumablesandReagentsCytometry/MaxparAntibodies/Anti-Mouse%20Ly-6C%20-HK1-4-162Dy%E2%80%94100%20Tests?ccl=en\\_US](https://store.fluidigm.com/Cytometry/ConsumablesandReagentsCytometry/MaxparAntibodies/Anti-Mouse%20Ly-6C%20-HK1-4-162Dy%E2%80%94100%20Tests?ccl=en_US)  
 Ly-6G DVS-Fluidigm 3141008B [https://store.fluidigm.com/Cytometry/ConsumablesandReagentsCytometry/MaxparAntibodies/Anti-Mouse%20Ly-6G%20-1A8-141Pr%E2%80%94100%20Tests?ccl=en\\_US](https://store.fluidigm.com/Cytometry/ConsumablesandReagentsCytometry/MaxparAntibodies/Anti-Mouse%20Ly-6G%20-1A8-141Pr%E2%80%94100%20Tests?ccl=en_US)

## Eukaryotic cell lines

Policy information about [cell lines](#)

|                                                                   |                                                                                                                                                                                                                                                                                                                                                                                           |
|-------------------------------------------------------------------|-------------------------------------------------------------------------------------------------------------------------------------------------------------------------------------------------------------------------------------------------------------------------------------------------------------------------------------------------------------------------------------------|
| Cell line source(s)                                               | The BXPC-3 (ATCC), Miapaca-2(ATCC), Capan-1(ATCC), ASPC-1(ATCC), Colo357/FG, L3.6PL, Panc28, Capan-2(ATCC), CF-Pac-1(ATCC), Panc3, Panc1(ATCC), Panc48, HPAC(ATCC), Hs766T(ATCC), SU86.86(ATCC), and SW1990 (ATCC) cell lines were from Dr. Mien-Chie Hung's lab stock. HY24409, HY19636, and HY24160 cell lines were from Dr. Haoqiang Ying. MCF-7 and HEK293T were purchased from ATCC. |
| Authentication                                                    | Short tandem repeat (STR) profiling was done by ATCC and MD Anderson's Characterized Cell Line Core Facility.                                                                                                                                                                                                                                                                             |
| Mycoplasma contamination                                          | All cell lines were confirmed to be mycoplasma free with a mycoplasma detection kit and treated with Plasmocin for the Prevention of mycoplasma contamination.                                                                                                                                                                                                                            |
| Commonly misidentified lines (See <a href="#">ICLAC</a> register) | No commonly misidentified cell lines were used.                                                                                                                                                                                                                                                                                                                                           |

## Animals and other organisms

Policy information about [studies involving animals](#); [ARRIVE guidelines](#) recommended for reporting animal research

|                         |                                                                                                                                                                                                                                                                                                                                                                                                                                                                                                                                                                |
|-------------------------|----------------------------------------------------------------------------------------------------------------------------------------------------------------------------------------------------------------------------------------------------------------------------------------------------------------------------------------------------------------------------------------------------------------------------------------------------------------------------------------------------------------------------------------------------------------|
| Laboratory animals      | Male and female C57BL/6 mice were from MD Anderson's internal supply or the Jackson Laboratory, and we performed the surgery when the mice were 6-8 weeks old. Male NSG (non-obese diabetic; severe combined immunodeficiency; interleukin-2 receptor gamma chain null) mice were from MD Anderson's internal supply, and six-week-old NSG mice received subcutaneous injection of tumor cells.<br><br>Mice were housed at 70F-74F (set point: 72F) with 40%-55% humidity (set point: 45%). The light cycle of animal rooms is 12 h of light and 12 h of dark. |
| Wild animals            | This study did not involve wild animals.                                                                                                                                                                                                                                                                                                                                                                                                                                                                                                                       |
| Field-collected samples | This study did not involve samples collected in the field.                                                                                                                                                                                                                                                                                                                                                                                                                                                                                                     |
| Ethics oversight        | All animal studies were performed in accordance with a protocol (PI: Li Ma) approved by the Institutional Animal Care and Use Committee of MD Anderson Cancer Center.                                                                                                                                                                                                                                                                                                                                                                                          |

Note that full information on the approval of the study protocol must also be provided in the manuscript.

## Human research participants

Policy information about [studies involving human research participants](#)

|                            |                                                                                                                                                                                                                                                                                                            |
|----------------------------|------------------------------------------------------------------------------------------------------------------------------------------------------------------------------------------------------------------------------------------------------------------------------------------------------------|
| Population characteristics | Our research did not involve human subjects, but used human samples from the Cancer Hospital of the University of Chinese Academy of Sciences. All PDAC specimens were obtained with informed consent from patients who underwent surgical resection of primary tumors. They were de-identified specimens. |
| Recruitment                | We did not recruit patients.                                                                                                                                                                                                                                                                               |
| Ethics oversight           | The collection and use of human samples were approved by the Ethics Committee of Cancer Hospital of the University of Chinese Academy of Sciences, following the Declaration of Helsinki ethical guidelines.                                                                                               |

Note that full information on the approval of the study protocol must also be provided in the manuscript.

### Plots

Confirm that:

- The axis labels state the marker and fluorochrome used (e.g. CD4-FITC).
- The axis scales are clearly visible. Include numbers along axes only for bottom left plot of group (a 'group' is an analysis of identical markers).
- All plots are contour plots with outliers or pseudocolor plots.
- A numerical value for number of cells or percentage (with statistics) is provided.

### Methodology

Sample preparation

For cultured cell lines, cells were incubated with the Accutase Cell Detachment Solution (BioLegend, 423201) and were washed twice with PBS. For the immunophenotyping of tumors, tumor samples were dissociated on the gentleMACS Dissociator (Miltenyi Biotec) using the Mouse Tumor Dissociation Kit (Miltenyi Biotec, 130-096-730) and were depleted of red blood cells using RBC Lysis Buffer (BioLegend, 420301).  $1 \times 10^6$  cells per sample were used for staining.

Instrument

Cells were analyzed on an Invitrogen Attune NxT Acoustic Focusing Cytometer.

Software

Cells were analyzed on an Invitrogen Attune NxT Acoustic Focusing Cytometer and analyzed by FlowJo software (FlowJo, LLC, version 10.4).

Cell population abundance

At least 10,000 cells were analyzed for each sample.

Gating strategy

Gating strategies are described in the Methods section (Flow cytometry) and Supplementary Table 2.

- Tick this box to confirm that a figure exemplifying the gating strategy is provided in the Supplementary Information.
